# Supplementary material
Source: MDPI journal article supplement (https://www.mdpi.com/2304-6740/2/4/540)
Supplement: s1 [file s1]

data_ACLPPh3Au

_audit_creation_method           SHELXL-2013
_chemical_name_systematic        ?
_chemical_name_common            ?
_chemical_formula_moiety         ?
_chemical_formula_sum            'C35 H34 Au N2 P'
_chemical_melting_point          ?

_exptl_crystal_description       Prism
_exptl_crystal_colour            Colourless

_diffrn_ambient_temperature      100(2)
_chemical_formula_weight         710.58

loop_
_atom_type_symbol
_atom_type_description
_atom_type_scat_dispersion_real
_atom_type_scat_dispersion_imag
_atom_type_scat_source
C C 0.0033 0.0016 'International Tables Vol C Tables 4.2.6.8 and 6.1.1.4'
H H 0.0000 0.0000 'International Tables Vol C Tables 4.2.6.8 and 6.1.1.4'
N N 0.0061 0.0033 'International Tables Vol C Tables 4.2.6.8 and 6.1.1.4'
P P 0.1023 0.0942 'International Tables Vol C Tables 4.2.6.8 and 6.1.1.4'
Au Au -2.0133 8.8022 'International Tables Vol C Tables 4.2.6.8 and 6.1.1.4'

_space_group_crystal_system      triclinic
_space_group_IT_number           2
_space_group_name_H-M_alt        'P -1'
_space_group_name_Hall           '-P 1'

_shelx_space_group_comment
;
The symmetry employed for this shelxl refinement is uniquely defined
by the following loop, which should always be used as a source of
symmetry information in preference to the above space-group names.
They are only intended as comments.
;

loop_
_space_group_symop_operation_xyz
'x, y, z'
'-x, -y, -z'

_cell_length_a                   10.641(2)
_cell_length_b                   14.542(3)
_cell_length_c                   20.465(4)
_cell_angle_alpha                83.247(2)
_cell_angle_beta                 78.545(2)
_cell_angle_gamma                75.244(2)
_cell_volume                     2993.8(11)
_cell_formula_units_Z            4
_cell_measurement_temperature    100(2)
_cell_measurement_reflns_used    9919
_cell_measurement_theta_min      2.2
_cell_measurement_theta_max      27.6
_exptl_crystal_density_meas      ?
_exptl_crystal_density_method    ?
_exptl_crystal_density_diffrn    1.577
_exptl_crystal_F_000             1408
_exptl_transmission_factor_min   ?
_exptl_transmission_factor_max   ?
_exptl_crystal_size_max          0.350
_exptl_crystal_size_mid          0.250
_exptl_crystal_size_min          0.250
_exptl_absorpt_coefficient_mu    4.993
_shelx_estimated_absorpt_T_min   0.274
_shelx_estimated_absorpt_T_max   0.368
_exptl_absorpt_correction_type   multi-scan
_exptl_absorpt_correction_T_min  0.28
_exptl_absorpt_correction_T_max  0.37
_exptl_absorpt_process_details
;
 Data were corrected for decay and absorption using the program SADABS
 (Sheldrick, G. M. (2003). SADABS. Version 2.10. University of
 G\"ottingen, Germany).
;

_exptl_special_details
;
 There is a strong pseudo translational relationship between the two independent 
 molecules which, though of very similar confirmation, vary significantly in some 
 conformational angles. Further, the program ADDSYM reports this as a pseudo
 translational relationship.
;
_diffrn_radiation_probe          ?
_diffrn_radiation_type           MoK\a
_diffrn_radiation_wavelength     0.71073
_diffrn_source                   ?
_diffrn_source_type              'sealed tube'

_diffrn_measurement_device_type  'Bruker APEXII CCD area detector'
_diffrn_measurement_method       'omega scans'
_diffrn_detector_area_resol_mean ?
_diffrn_reflns_number            35373
_diffrn_reflns_av_unetI/netI     0.0370
_diffrn_reflns_av_R_equivalents  0.0290
_diffrn_reflns_limit_h_min       -13
_diffrn_reflns_limit_h_max       13
_diffrn_reflns_limit_k_min       -18
_diffrn_reflns_limit_k_max       18
_diffrn_reflns_limit_l_min       -26
_diffrn_reflns_limit_l_max       26
_diffrn_reflns_theta_min         1.018
_diffrn_reflns_theta_max         27.587
_diffrn_reflns_theta_full        25.242
_diffrn_measured_fraction_theta_max 0.980
_diffrn_measured_fraction_theta_full 0.998
_diffrn_reflns_Laue_measured_fraction_max 0.980
_diffrn_reflns_Laue_measured_fraction_full 0.998
_diffrn_reflns_point_group_measured_fraction_max 0.980
_diffrn_reflns_point_group_measured_fraction_full 0.998
_reflns_number_total             13601
_reflns_number_gt                10874
_reflns_threshold_expression     'I > 2\s(I)'
_reflns_Friedel_coverage         0.000
_reflns_Friedel_fraction_max     .
_reflns_Friedel_fraction_full    .

_reflns_special_details
;
 Reflections were merged by SHELXL according to the crystal
 class for the calculation of statistics and refinement.

 _reflns_Friedel_fraction is defined as the number of unique
 Friedel pairs measured divided by the number that would be
 possible theoretically, ignoring centric projections and
 systematic absences.
;

_computing_data_collection       'APEX2 (Bruker AXS, 2008)'
_computing_cell_refinement       'APEX2 (Bruker AXS, 2008)'
_computing_data_reduction        'APEX2 (Bruker AXS, 2008)'
_computing_structure_solution    'SHELXS-2013 (Sheldrick, 2013)'
_computing_structure_refinement  'SHELXL-2013 (Sheldrick, 2013)'
_computing_molecular_graphics    'X-SEED, Barbour, 2001'
_computing_publication_material  'CIFTAB (Sheldrick, 2013)'

_refine_special_details
;
 ?
;
_refine_ls_structure_factor_coef Fsqd
_refine_ls_matrix_type           full
_refine_ls_weighting_scheme      calc
_refine_ls_weighting_details
'w=1/[\s^2^(Fo^2^)+(0.0230P)^2^] where P=(Fo^2^+2Fc^2^)/3'
_atom_sites_solution_primary     ?
_atom_sites_solution_secondary   ?
_atom_sites_solution_hydrogens   geom
_refine_ls_hydrogen_treatment    constr
_refine_ls_extinction_method     none
_refine_ls_extinction_coef       .
_refine_ls_number_reflns         13601
_refine_ls_number_parameters     711
_refine_ls_number_restraints     0
_refine_ls_R_factor_all          0.0343
_refine_ls_R_factor_gt           0.0236
_refine_ls_wR_factor_ref         0.0536
_refine_ls_wR_factor_gt          0.0498
_refine_ls_goodness_of_fit_ref   0.966
_refine_ls_restrained_S_all      0.966
_refine_ls_shift/su_max          0.003
_refine_ls_shift/su_mean         0.000

loop_
_atom_site_label
_atom_site_type_symbol
_atom_site_fract_x
_atom_site_fract_y
_atom_site_fract_z
_atom_site_U_iso_or_equiv
_atom_site_adp_type
_atom_site_occupancy
_atom_site_site_symmetry_order
_atom_site_calc_flag
_atom_site_refinement_flags_posn
_atom_site_refinement_flags_adp
_atom_site_refinement_flags_occupancy
_atom_site_disorder_assembly
_atom_site_disorder_group
C8A C 0.7811(3) 0.5093(2) 0.35329(17) 0.0356(9) Uani 1 1 d . . . . .
H8A1 H 0.8219 0.5165 0.3907 0.053 Uiso 1 1 calc R U . . .
H8A2 H 0.8044 0.4421 0.3435 0.053 Uiso 1 1 calc R U . . .
H8A3 H 0.6849 0.5311 0.3652 0.053 Uiso 1 1 calc R U . . .
C14B C -0.1721(3) 0.8007(2) 1.00908(16) 0.0276(8) Uani 1 1 d . . . . .
H14B H -0.2249 0.7608 1.0346 0.033 Uiso 1 1 calc R U . . .
C16B C 0.0648(3) 0.9829(2) 0.89433(17) 0.0321(8) Uani 1 1 d . . . . .
H16A H 0.1187 1.0001 0.9224 0.048 Uiso 1 1 calc R U . . .
H16B H 0.0072 1.0408 0.8773 0.048 Uiso 1 1 calc R U . . .
H16C H 0.1226 0.9489 0.8567 0.048 Uiso 1 1 calc R U . . .
C7A C 0.7858(3) 0.8311(2) 0.22883(17) 0.0315(8) Uani 1 1 d . . . . .
H7A1 H 0.8197 0.8571 0.1843 0.047 Uiso 1 1 calc R U . . .
H7A2 H 0.8180 0.8570 0.2627 0.047 Uiso 1 1 calc R U . . .
H7A3 H 0.6891 0.8489 0.2368 0.047 Uiso 1 1 calc R U . . .
C7B C 0.2926(3) 0.8392(2) 0.72154(16) 0.0304(8) Uani 1 1 d . . . . .
H7B1 H 0.3270 0.8692 0.7524 0.046 Uiso 1 1 calc R U . . .
H7B2 H 0.1959 0.8563 0.7313 0.046 Uiso 1 1 calc R U . . .
H7B3 H 0.3230 0.8617 0.6755 0.046 Uiso 1 1 calc R U . . .
Au1A Au 0.50370(2) 0.73494(2) 0.33068(2) 0.01531(4) Uani 1 1 d . . . . .
P1A P 0.30863(7) 0.74038(5) 0.30394(4) 0.01407(16) Uani 1 1 d . . . . .
N1A N 0.6940(2) 0.71462(17) 0.34307(12) 0.0190(6) Uani 1 1 d . . . . .
N2A N 0.6772(3) 0.78085(19) 0.44670(13) 0.0263(6) Uani 1 1 d . . . . .
C1A C 0.7878(3) 0.6684(2) 0.28932(15) 0.0185(6) Uani 1 1 d . . . . .
C2A C 0.8332(3) 0.7236(2) 0.23297(16) 0.0217(7) Uani 1 1 d . . . . .
C3A C 0.9221(3) 0.6776(2) 0.18029(15) 0.0229(7) Uani 1 1 d . . . . .
H3A H 0.9538 0.7143 0.1420 0.027 Uiso 1 1 calc R U . . .
C4A C 0.9646(3) 0.5793(2) 0.18298(16) 0.0273(7) Uani 1 1 d . . . . .
H4A H 1.0256 0.5491 0.1468 0.033 Uiso 1 1 calc R U . . .
C5A C 0.9183(3) 0.5251(2) 0.23847(16) 0.0292(8) Uani 1 1 d . . . . .
H5A H 0.9469 0.4575 0.2398 0.035 Uiso 1 1 calc R U . . .
C6A C 0.8304(3) 0.5683(2) 0.29233(15) 0.0233(7) Uani 1 1 d . . . . .
C9A C 0.7400(3) 0.7374(2) 0.39392(15) 0.0202(7) Uani 1 1 d . . . . .
H9A H 0.8333 0.7188 0.3906 0.024 Uiso 1 1 calc R U . . .
C10A C 0.5379(3) 0.8092(2) 0.45861(15) 0.0244(7) Uani 1 1 d . . . . .
C11A C 0.4756(3) 0.9037(2) 0.44084(17) 0.0301(8) Uani 1 1 d . . . . .
C12A C 0.3393(3) 0.9340(3) 0.45964(19) 0.0397(10) Uani 1 1 d . . . . .
H12A H 0.2961 0.9975 0.4474 0.048 Uiso 1 1 calc R U . . .
C13A C 0.2665(4) 0.8740(3) 0.49539(19) 0.0451(11) Uani 1 1 d . . . . .
H13A H 0.1738 0.8964 0.5085 0.054 Uiso 1 1 calc R U . . .
C14A C 0.3276(3) 0.7802(3) 0.51263(17) 0.0376(9) Uani 1 1 d . . . . .
H14A H 0.2763 0.7388 0.5375 0.045 Uiso 1 1 calc R U . . .
C15A C 0.4641(3) 0.7461(3) 0.49363(16) 0.0296(8) Uani 1 1 d . . . . .
C16A C 0.5545(4) 0.9706(3) 0.40137(19) 0.0419(10) Uani 1 1 d . . . . .
H16D H 0.6155 0.9818 0.4280 0.063 Uiso 1 1 calc R U . . .
H16E H 0.4946 1.0313 0.3903 0.063 Uiso 1 1 calc R U . . .
H16F H 0.6048 0.9423 0.3601 0.063 Uiso 1 1 calc R U . . .
C17A C 0.5315(4) 0.6441(3) 0.50980(17) 0.0383(9) Uani 1 1 d . . . . .
H17A H 0.4671 0.6113 0.5370 0.057 Uiso 1 1 calc R U . . .
H17B H 0.6020 0.6423 0.5347 0.057 Uiso 1 1 calc R U . . .
H17C H 0.5693 0.6124 0.4682 0.057 Uiso 1 1 calc R U . . .
C18A C 0.3203(3) 0.74149(19) 0.21378(15) 0.0171(6) Uani 1 1 d . . . . .
C19A C 0.4452(3) 0.71995(19) 0.17376(14) 0.0177(6) Uani 1 1 d . . . . .
H19A H 0.5217 0.7009 0.1940 0.021 Uiso 1 1 calc R U . . .
C20A C 0.4584(3) 0.7263(2) 0.10452(15) 0.0213(7) Uani 1 1 d . . . . .
H20A H 0.5436 0.7118 0.0776 0.026 Uiso 1 1 calc R U . . .
C21A C 0.3463(3) 0.7539(2) 0.07465(16) 0.0231(7) Uani 1 1 d . . . . .
H21A H 0.3549 0.7587 0.0273 0.028 Uiso 1 1 calc R U . . .
C22A C 0.2229(3) 0.7740(2) 0.11414(16) 0.0227(7) Uani 1 1 d . . . . .
H22A H 0.1465 0.7922 0.0938 0.027 Uiso 1 1 calc R U . . .
C23A C 0.2089(3) 0.7681(2) 0.18352(15) 0.0201(7) Uani 1 1 d . . . . .
H23A H 0.1234 0.7821 0.2102 0.024 Uiso 1 1 calc R U . . .
C24A C 0.1775(3) 0.8435(2) 0.32928(14) 0.0177(6) Uani 1 1 d . . . . .
C25A C 0.2095(3) 0.9308(2) 0.32620(16) 0.0260(7) Uani 1 1 d . . . . .
H25A H 0.2984 0.9353 0.3115 0.031 Uiso 1 1 calc R U . . .
C26A C 0.1118(4) 1.0117(2) 0.34454(17) 0.0337(8) Uani 1 1 d . . . . .
H26A H 0.1339 1.0715 0.3420 0.040 Uiso 1 1 calc R U . . .
C27A C -0.0170(3) 1.0053(3) 0.36637(17) 0.0356(9) Uani 1 1 d . . . . .
H27A H -0.0839 1.0608 0.3783 0.043 Uiso 1 1 calc R U . . .
C28A C -0.0489(3) 0.9183(3) 0.3709(2) 0.0490(11) Uani 1 1 d . . . . .
H28A H -0.1373 0.9135 0.3869 0.059 Uiso 1 1 calc R U . . .
C29A C 0.0484(3) 0.8381(3) 0.3520(2) 0.0397(10) Uani 1 1 d . . . . .
H29A H 0.0260 0.7784 0.3547 0.048 Uiso 1 1 calc R U . . .
C30A C 0.2430(3) 0.6400(2) 0.34356(15) 0.0180(6) Uani 1 1 d . . . . .
C31A C 0.2480(3) 0.6206(2) 0.41159(16) 0.0311(8) Uani 1 1 d . . . . .
H31A H 0.2880 0.6571 0.4332 0.037 Uiso 1 1 calc R U . . .
C32A C 0.1949(4) 0.5481(3) 0.44788(18) 0.0387(9) Uani 1 1 d . . . . .
H32A H 0.1972 0.5360 0.4943 0.046 Uiso 1 1 calc R U . . .
C33A C 0.1388(3) 0.4939(2) 0.41632(17) 0.0309(8) Uani 1 1 d . . . . .
H33A H 0.1020 0.4445 0.4410 0.037 Uiso 1 1 calc R U . . .
C34A C 0.1363(3) 0.5115(2) 0.34898(17) 0.0270(8) Uani 1 1 d . . . . .
H34A H 0.0995 0.4731 0.3272 0.032 Uiso 1 1 calc R U . . .
C35A C 0.1869(3) 0.5845(2) 0.31253(16) 0.0219(7) Uani 1 1 d . . . . .
H35A H 0.1832 0.5965 0.2662 0.026 Uiso 1 1 calc R U . . .
Au1B Au 0.01122(2) 0.74823(2) 0.82772(2) 0.01421(3) Uani 1 1 d . . . . .
P1B P -0.18427(7) 0.74935(5) 0.80300(4) 0.01391(16) Uani 1 1 d . . . . .
N1B N 0.2008(2) 0.73031(16) 0.84009(12) 0.0166(5) Uani 1 1 d . . . . .
N2B N 0.1803(2) 0.79306(18) 0.94533(13) 0.0232(6) Uani 1 1 d . . . . .
C1B C 0.2971(3) 0.6809(2) 0.78828(14) 0.0172(6) Uani 1 1 d . . . . .
C2B C 0.3415(3) 0.7326(2) 0.72996(15) 0.0187(6) Uani 1 1 d . . . . .
C3B C 0.4316(3) 0.6836(2) 0.67945(15) 0.0231(7) Uani 1 1 d . . . . .
H3B H 0.4616 0.7179 0.6394 0.028 Uiso 1 1 calc R U . . .
C4B C 0.4787(3) 0.5854(2) 0.68632(16) 0.0261(7) Uani 1 1 d . . . . .
H4B H 0.5413 0.5529 0.6516 0.031 Uiso 1 1 calc R U . . .
C5B C 0.4337(3) 0.5352(2) 0.74417(16) 0.0278(8) Uani 1 1 d . . . . .
H5B H 0.4651 0.4679 0.7486 0.033 Uiso 1 1 calc R U . . .
C6B C 0.3434(3) 0.5814(2) 0.79585(15) 0.0229(7) Uani 1 1 d . . . . .
C8B C 0.2949(3) 0.5260(2) 0.85898(16) 0.0328(8) Uani 1 1 d . . . . .
H8B1 H 0.3286 0.5416 0.8965 0.049 Uiso 1 1 calc R U . . .
H8B2 H 0.3264 0.4575 0.8531 0.049 Uiso 1 1 calc R U . . .
H8B3 H 0.1981 0.5430 0.8683 0.049 Uiso 1 1 calc R U . . .
C9B C 0.2452(3) 0.7501(2) 0.89257(15) 0.0177(6) Uani 1 1 d . . . . .
H9B H 0.3380 0.7296 0.8907 0.021 Uiso 1 1 calc R U . . .
C10B C 0.0413(3) 0.8248(2) 0.95553(14) 0.0194(7) Uani 1 1 d . . . . .
C11B C -0.0184(3) 0.9194(2) 0.93528(15) 0.0232(7) Uani 1 1 d . . . . .
C12B C -0.1544(3) 0.9516(2) 0.95320(17) 0.0288(8) Uani 1 1 d . . . . .
H12B H -0.1955 1.0151 0.9397 0.035 Uiso 1 1 calc R U . . .
C13B C -0.2314(3) 0.8937(3) 0.99011(17) 0.0317(8) Uani 1 1 d . . . . .
H13B H -0.3241 0.9174 1.0024 0.038 Uiso 1 1 calc R U . . .
C15B C -0.0369(3) 0.7644(2) 0.99160(15) 0.0232(7) Uani 1 1 d . . . . .
C17B C 0.0270(3) 0.6617(2) 1.00887(16) 0.0297(8) Uani 1 1 d . . . . .
H17D H -0.0395 0.6304 1.0357 0.045 Uiso 1 1 calc R U . . .
H17E H 0.0968 0.6588 1.0345 0.045 Uiso 1 1 calc R U . . .
H17F H 0.0653 0.6292 0.9677 0.045 Uiso 1 1 calc R U . . .
C18B C -0.1757(3) 0.74917(19) 0.71349(14) 0.0155(6) Uani 1 1 d . . . . .
C19B C -0.0522(3) 0.72848(19) 0.67265(14) 0.0175(6) Uani 1 1 d . . . . .
H19B H 0.0252 0.7104 0.6922 0.021 Uiso 1 1 calc R U . . .
C20B C -0.0410(3) 0.7340(2) 0.60326(15) 0.0222(7) Uani 1 1 d . . . . .
H20B H 0.0438 0.7201 0.5758 0.027 Uiso 1 1 calc R U . . .
C21B C -0.1537(3) 0.7600(2) 0.57418(16) 0.0227(7) Uani 1 1 d . . . . .
H21B H -0.1464 0.7646 0.5269 0.027 Uiso 1 1 calc R U . . .
C22B C -0.2771(3) 0.7791(2) 0.61497(16) 0.0243(7) Uani 1 1 d . . . . .
H22B H -0.3544 0.7956 0.5954 0.029 Uiso 1 1 calc R U . . .
C23B C -0.2886(3) 0.7744(2) 0.68411(15) 0.0199(7) Uani 1 1 d . . . . .
H23B H -0.3735 0.7885 0.7114 0.024 Uiso 1 1 calc R U . . .
C24B C -0.3183(3) 0.8512(2) 0.82862(14) 0.0164(6) Uani 1 1 d . . . . .
C25B C -0.2908(3) 0.9401(2) 0.82233(16) 0.0255(7) Uani 1 1 d . . . . .
H25B H -0.2033 0.9464 0.8057 0.031 Uiso 1 1 calc R U . . .
C26B C -0.3903(3) 1.0200(2) 0.84018(17) 0.0294(8) Uani 1 1 d . . . . .
H26B H -0.3712 1.0810 0.8350 0.035 Uiso 1 1 calc R U . . .
C27B C -0.5164(3) 1.0106(2) 0.86536(17) 0.0315(8) Uani 1 1 d . . . . .
H27B H -0.5849 1.0654 0.8769 0.038 Uiso 1 1 calc R U . . .
C28B C -0.5437(3) 0.9223(3) 0.8738(2) 0.0459(11) Uani 1 1 d . . . . .
H28B H -0.6306 0.9158 0.8921 0.055 Uiso 1 1 calc R U . . .
C29B C -0.4441(3) 0.8425(2) 0.8555(2) 0.0394(10) Uani 1 1 d . . . . .
H29B H -0.4631 0.7814 0.8617 0.047 Uiso 1 1 calc R U . . .
C30B C -0.2433(3) 0.6471(2) 0.84524(15) 0.0170(6) Uani 1 1 d . . . . .
C31B C -0.2291(3) 0.6269(2) 0.91190(16) 0.0262(7) Uani 1 1 d . . . . .
H31B H -0.1866 0.6637 0.9317 0.031 Uiso 1 1 calc R U . . .
C32B C -0.2768(3) 0.5532(2) 0.94956(17) 0.0319(8) Uani 1 1 d . . . . .
H32B H -0.2679 0.5405 0.9952 0.038 Uiso 1 1 calc R U . . .
C33B C -0.3369(3) 0.4982(2) 0.92130(17) 0.0284(8) Uani 1 1 d . . . . .
H33B H -0.3697 0.4479 0.9473 0.034 Uiso 1 1 calc R U . . .
C34B C -0.3489(3) 0.5170(2) 0.85474(17) 0.0275(8) Uani 1 1 d . . . . .
H34B H -0.3885 0.4783 0.8348 0.033 Uiso 1 1 calc R U . . .
C35B C -0.3038(3) 0.5917(2) 0.81643(16) 0.0230(7) Uani 1 1 d . . . . .
H35B H -0.3143 0.6048 0.7710 0.028 Uiso 1 1 calc R U . . .

loop_
_atom_site_aniso_label
_atom_site_aniso_U_11
_atom_site_aniso_U_22
_atom_site_aniso_U_33
_atom_site_aniso_U_23
_atom_site_aniso_U_13
_atom_site_aniso_U_12
C8A 0.037(2) 0.035(2) 0.024(2) 0.0013(15) 0.0011(16) 0.0046(17)
C14B 0.0229(18) 0.042(2) 0.0214(18) -0.0097(15) 0.0002(14) -0.0135(16)
C16B 0.0290(19) 0.0279(18) 0.037(2) -0.0048(16) -0.0040(16) -0.0024(15)
C7A 0.035(2) 0.0291(19) 0.028(2) -0.0052(15) 0.0011(16) -0.0077(16)
C7B 0.037(2) 0.0254(18) 0.0252(19) 0.0014(14) 0.0024(16) -0.0083(16)
Au1A 0.01099(6) 0.02103(6) 0.01394(7) -0.00506(5) -0.00352(5) -0.00113(5)
P1A 0.0116(4) 0.0156(4) 0.0151(4) -0.0033(3) -0.0033(3) -0.0015(3)
N1A 0.0093(12) 0.0304(14) 0.0164(14) -0.0055(11) -0.0041(10) -0.0001(11)
N2A 0.0187(15) 0.0396(16) 0.0217(16) -0.0138(13) -0.0066(12) -0.0016(13)
C1A 0.0105(14) 0.0281(17) 0.0150(16) -0.0038(13) -0.0032(12) 0.0003(13)
C2A 0.0193(16) 0.0261(17) 0.0218(18) -0.0040(13) -0.0050(13) -0.0072(14)
C3A 0.0205(17) 0.0366(19) 0.0129(16) -0.0021(13) -0.0008(13) -0.0106(15)
C4A 0.0218(17) 0.039(2) 0.0177(18) -0.0079(14) -0.0007(14) -0.0001(15)
C5A 0.0296(19) 0.0267(18) 0.0220(19) -0.0014(14) -0.0011(15) 0.0073(15)
C6A 0.0208(17) 0.0290(17) 0.0151(17) 0.0001(13) -0.0030(13) 0.0025(14)
C9A 0.0150(16) 0.0275(17) 0.0187(17) -0.0035(13) -0.0046(13) -0.0038(13)
C10A 0.0171(16) 0.0390(19) 0.0173(17) -0.0156(14) -0.0053(13) 0.0009(15)
C11A 0.0296(19) 0.0357(19) 0.025(2) -0.0165(15) -0.0084(16) 0.0012(16)
C12A 0.029(2) 0.050(2) 0.037(2) -0.0271(19) -0.0098(18) 0.0097(18)
C13A 0.0191(19) 0.078(3) 0.036(2) -0.035(2) -0.0016(17) 0.005(2)
C14A 0.028(2) 0.073(3) 0.0167(19) -0.0205(18) 0.0029(15) -0.018(2)
C15A 0.0274(19) 0.049(2) 0.0132(17) -0.0125(15) -0.0048(14) -0.0046(17)
C16A 0.040(2) 0.037(2) 0.048(3) -0.0146(18) -0.0095(19) -0.0004(18)
C17A 0.044(2) 0.051(2) 0.0187(19) -0.0070(16) -0.0007(17) -0.0120(19)
C18A 0.0216(16) 0.0127(14) 0.0180(16) -0.0020(12) -0.0061(13) -0.0038(12)
C19A 0.0190(16) 0.0164(14) 0.0183(17) 0.0009(12) -0.0062(13) -0.0039(13)
C20A 0.0223(17) 0.0231(16) 0.0170(17) -0.0031(13) -0.0002(13) -0.0047(13)
C21A 0.0325(19) 0.0215(16) 0.0172(17) -0.0021(13) -0.0067(14) -0.0079(14)
C22A 0.0249(17) 0.0222(16) 0.0243(18) 0.0011(13) -0.0124(14) -0.0067(14)
C23A 0.0180(16) 0.0214(16) 0.0223(17) -0.0017(13) -0.0059(13) -0.0054(13)
C24A 0.0161(15) 0.0201(15) 0.0149(16) -0.0068(12) -0.0030(12) 0.0017(13)
C25A 0.0308(19) 0.0217(16) 0.0223(18) -0.0064(14) 0.0029(15) -0.0045(14)
C26A 0.042(2) 0.0198(17) 0.033(2) -0.0037(15) -0.0010(17) 0.0003(16)
C27A 0.034(2) 0.035(2) 0.030(2) -0.0156(16) -0.0085(17) 0.0154(17)
C28A 0.0144(18) 0.051(3) 0.077(3) -0.027(2) -0.0004(19) 0.0038(17)
C29A 0.0204(18) 0.032(2) 0.068(3) -0.0199(19) -0.0026(18) -0.0061(16)
C30A 0.0166(15) 0.0186(15) 0.0176(17) -0.0036(12) -0.0010(13) -0.0026(13)
C31A 0.049(2) 0.0305(18) 0.0184(18) -0.0029(14) -0.0057(16) -0.0175(17)
C32A 0.058(3) 0.041(2) 0.0189(19) 0.0033(16) -0.0043(18) -0.020(2)
C33A 0.037(2) 0.0216(17) 0.031(2) 0.0034(15) 0.0044(16) -0.0110(15)
C34A 0.0298(19) 0.0210(16) 0.033(2) -0.0047(14) -0.0061(15) -0.0098(14)
C35A 0.0241(17) 0.0210(16) 0.0214(18) -0.0008(13) -0.0056(14) -0.0056(13)
Au1B 0.01102(6) 0.01791(6) 0.01377(7) -0.00353(5) -0.00346(5) -0.00154(5)
P1B 0.0124(4) 0.0152(4) 0.0149(4) -0.0026(3) -0.0035(3) -0.0030(3)
N1B 0.0116(12) 0.0211(13) 0.0166(14) -0.0043(10) -0.0026(10) -0.0020(10)
N2B 0.0193(14) 0.0298(15) 0.0215(15) -0.0056(12) -0.0069(12) -0.0034(12)
C1B 0.0123(15) 0.0252(16) 0.0148(16) -0.0046(12) -0.0034(12) -0.0037(13)
C2B 0.0172(16) 0.0221(15) 0.0174(17) -0.0045(12) -0.0033(13) -0.0041(13)
C3B 0.0212(17) 0.0341(18) 0.0152(17) -0.0008(13) -0.0023(13) -0.0099(14)
C4B 0.0194(17) 0.0348(19) 0.0195(18) -0.0083(14) 0.0000(14) 0.0021(14)
C5B 0.0269(18) 0.0297(18) 0.0201(18) -0.0030(14) -0.0023(14) 0.0048(15)
C6B 0.0241(17) 0.0260(17) 0.0158(17) -0.0008(13) -0.0032(13) -0.0013(14)
C8B 0.038(2) 0.0270(18) 0.0237(19) 0.0039(15) 0.0044(16) 0.0000(16)
C9B 0.0120(15) 0.0226(16) 0.0204(17) -0.0006(13) -0.0065(13) -0.0050(13)
C10B 0.0180(16) 0.0288(17) 0.0135(16) -0.0126(13) -0.0037(13) -0.0040(14)
C11B 0.0239(17) 0.0280(17) 0.0182(17) -0.0098(13) -0.0063(14) -0.0013(14)
C12B 0.0224(18) 0.0301(18) 0.030(2) -0.0105(15) -0.0050(15) 0.0048(15)
C13B 0.0180(18) 0.044(2) 0.031(2) -0.0160(17) 0.0012(15) -0.0014(16)
C15B 0.0263(18) 0.0327(18) 0.0118(16) -0.0112(13) -0.0029(13) -0.0054(15)
C17B 0.035(2) 0.0348(19) 0.0188(18) -0.0033(14) -0.0023(15) -0.0091(16)
C18B 0.0197(16) 0.0118(14) 0.0159(16) -0.0018(11) -0.0040(13) -0.0041(12)
C19B 0.0188(16) 0.0156(14) 0.0194(17) -0.0046(12) -0.0062(13) -0.0026(13)
C20B 0.0215(17) 0.0226(16) 0.0218(18) -0.0057(13) -0.0004(14) -0.0048(13)
C21B 0.0324(19) 0.0211(16) 0.0175(17) -0.0008(13) -0.0079(14) -0.0090(14)
C22B 0.0267(18) 0.0257(17) 0.0249(19) 0.0005(14) -0.0149(15) -0.0071(14)
C23B 0.0167(16) 0.0214(16) 0.0222(17) -0.0019(13) -0.0045(13) -0.0049(13)
C24B 0.0151(15) 0.0174(15) 0.0165(16) -0.0039(12) -0.0044(12) -0.0010(12)
C25B 0.0267(18) 0.0210(16) 0.0255(19) -0.0037(14) 0.0048(15) -0.0059(14)
C26B 0.038(2) 0.0156(16) 0.029(2) -0.0045(14) 0.0017(16) -0.0014(15)
C27B 0.028(2) 0.0269(18) 0.030(2) -0.0085(15) -0.0017(16) 0.0098(15)
C28B 0.0162(19) 0.039(2) 0.078(3) -0.017(2) 0.0024(19) -0.0016(17)
C29B 0.0167(18) 0.0249(18) 0.076(3) -0.0159(19) 0.0007(18) -0.0062(15)
C30B 0.0141(15) 0.0148(14) 0.0208(17) -0.0014(12) -0.0008(12) -0.0025(12)
C31B 0.0325(19) 0.0266(17) 0.0224(18) -0.0048(14) -0.0058(15) -0.0105(15)
C32B 0.047(2) 0.0302(19) 0.0175(18) 0.0006(14) -0.0028(16) -0.0112(17)
C33B 0.035(2) 0.0211(17) 0.027(2) -0.0003(14) 0.0016(16) -0.0086(15)
C34B 0.0318(19) 0.0218(16) 0.033(2) -0.0044(14) -0.0061(16) -0.0128(15)
C35B 0.0293(18) 0.0207(16) 0.0221(18) -0.0026(13) -0.0080(14) -0.0085(14)

_geom_special_details
;
 All esds (except the esd in the dihedral angle between two l.s. planes)
 are estimated using the full covariance matrix.  The cell esds are taken
 into account individually in the estimation of esds in distances, angles
 and torsion angles; correlations between esds in cell parameters are only
 used when they are defined by crystal symmetry.  An approximate (isotropic)
 treatment of cell esds is used for estimating esds involving l.s. planes.
;

loop_
_geom_bond_atom_site_label_1
_geom_bond_atom_site_label_2
_geom_bond_distance
_geom_bond_site_symmetry_2
_geom_bond_publ_flag
C8A C6A 1.512(4) . ?
C8A H8A1 0.9800 . ?
C8A H8A2 0.9800 . ?
C8A H8A3 0.9800 . ?
C14B C13B 1.385(5) . ?
C14B C15B 1.389(4) . ?
C14B H14B 0.9500 . ?
C16B C11B 1.509(4) . ?
C16B H16A 0.9800 . ?
C16B H16B 0.9800 . ?
C16B H16C 0.9800 . ?
C7A C2A 1.513(4) . ?
C7A H7A1 0.9800 . ?
C7A H7A2 0.9800 . ?
C7A H7A3 0.9800 . ?
C7B C2B 1.506(4) . ?
C7B H7B1 0.9800 . ?
C7B H7B2 0.9800 . ?
C7B H7B3 0.9800 . ?
Au1A N1A 2.033(2) . ?
Au1A P1A 2.2297(8) . ?
P1A C30A 1.814(3) . ?
P1A C24A 1.815(3) . ?
P1A C18A 1.823(3) . ?
N1A C9A 1.342(4) . ?
N1A C1A 1.434(4) . ?
N2A C9A 1.293(4) . ?
N2A C10A 1.413(4) . ?
C1A C2A 1.402(4) . ?
C1A C6A 1.408(4) . ?
C2A C3A 1.396(4) . ?
C3A C4A 1.382(4) . ?
C3A H3A 0.9500 . ?
C4A C5A 1.386(4) . ?
C4A H4A 0.9500 . ?
C5A C6A 1.393(4) . ?
C5A H5A 0.9500 . ?
C9A H9A 0.9500 . ?
C10A C15A 1.400(4) . ?
C10A C11A 1.405(4) . ?
C11A C12A 1.393(5) . ?
C11A C16A 1.506(5) . ?
C12A C13A 1.366(5) . ?
C12A H12A 0.9500 . ?
C13A C14A 1.391(5) . ?
C13A H13A 0.9500 . ?
C14A C15A 1.400(5) . ?
C14A H14A 0.9500 . ?
C15A C17A 1.503(5) . ?
C16A H16D 0.9800 . ?
C16A H16E 0.9800 . ?
C16A H16F 0.9800 . ?
C17A H17A 0.9800 . ?
C17A H17B 0.9800 . ?
C17A H17C 0.9800 . ?
C18A C23A 1.393(4) . ?
C18A C19A 1.397(4) . ?
C19A C20A 1.390(4) . ?
C19A H19A 0.9500 . ?
C20A C21A 1.395(4) . ?
C20A H20A 0.9500 . ?
C21A C22A 1.379(4) . ?
C21A H21A 0.9500 . ?
C22A C23A 1.393(4) . ?
C22A H22A 0.9500 . ?
C23A H23A 0.9500 . ?
C24A C29A 1.379(4) . ?
C24A C25A 1.388(4) . ?
C25A C26A 1.389(4) . ?
C25A H25A 0.9500 . ?
C26A C27A 1.378(5) . ?
C26A H26A 0.9500 . ?
C27A C28A 1.380(5) . ?
C27A H27A 0.9500 . ?
C28A C29A 1.383(5) . ?
C28A H28A 0.9500 . ?
C29A H29A 0.9500 . ?
C30A C35A 1.389(4) . ?
C30A C31A 1.397(4) . ?
C31A C32A 1.390(4) . ?
C31A H31A 0.9500 . ?
C32A C33A 1.382(5) . ?
C32A H32A 0.9500 . ?
C33A C34A 1.376(5) . ?
C33A H33A 0.9500 . ?
C34A C35A 1.384(4) . ?
C34A H34A 0.9500 . ?
C35A H35A 0.9500 . ?
Au1B N1B 2.030(2) . ?
Au1B P1B 2.2322(8) . ?
P1B C18B 1.816(3) . ?
P1B C30B 1.820(3) . ?
P1B C24B 1.820(3) . ?
N1B C9B 1.343(4) . ?
N1B C1B 1.436(4) . ?
N2B C9B 1.294(4) . ?
N2B C10B 1.414(4) . ?
C1B C2B 1.399(4) . ?
C1B C6B 1.405(4) . ?
C2B C3B 1.388(4) . ?
C3B C4B 1.389(4) . ?
C3B H3B 0.9500 . ?
C4B C5B 1.383(4) . ?
C4B H4B 0.9500 . ?
C5B C6B 1.388(4) . ?
C5B H5B 0.9500 . ?
C6B C8B 1.512(4) . ?
C8B H8B1 0.9800 . ?
C8B H8B2 0.9800 . ?
C8B H8B3 0.9800 . ?
C9B H9B 0.9500 . ?
C10B C15B 1.408(4) . ?
C10B C11B 1.412(4) . ?
C11B C12B 1.391(4) . ?
C12B C13B 1.380(5) . ?
C12B H12B 0.9500 . ?
C13B H13B 0.9500 . ?
C15B C17B 1.507(4) . ?
C17B H17D 0.9800 . ?
C17B H17E 0.9800 . ?
C17B H17F 0.9800 . ?
C18B C19B 1.392(4) . ?
C18B C23B 1.397(4) . ?
C19B C20B 1.396(4) . ?
C19B H19B 0.9500 . ?
C20B C21B 1.390(4) . ?
C20B H20B 0.9500 . ?
C21B C22B 1.390(4) . ?
C21B H21B 0.9500 . ?
C22B C23B 1.391(4) . ?
C22B H22B 0.9500 . ?
C23B H23B 0.9500 . ?
C24B C29B 1.374(4) . ?
C24B C25B 1.383(4) . ?
C25B C26B 1.387(4) . ?
C25B H25B 0.9500 . ?
C26B C27B 1.374(4) . ?
C26B H26B 0.9500 . ?
C27B C28B 1.371(5) . ?
C27B H27B 0.9500 . ?
C28B C29B 1.388(5) . ?
C28B H28B 0.9500 . ?
C29B H29B 0.9500 . ?
C30B C31B 1.391(4) . ?
C30B C35B 1.392(4) . ?
C31B C32B 1.389(4) . ?
C31B H31B 0.9500 . ?
C32B C33B 1.378(5) . ?
C32B H32B 0.9500 . ?
C33B C34B 1.382(4) . ?
C33B H33B 0.9500 . ?
C34B C35B 1.393(4) . ?
C34B H34B 0.9500 . ?
C35B H35B 0.9500 . ?

loop_
_geom_angle_atom_site_label_1
_geom_angle_atom_site_label_2
_geom_angle_atom_site_label_3
_geom_angle
_geom_angle_site_symmetry_1
_geom_angle_site_symmetry_3
_geom_angle_publ_flag
C6A C8A H8A1 109.5 . . ?
C6A C8A H8A2 109.5 . . ?
H8A1 C8A H8A2 109.5 . . ?
C6A C8A H8A3 109.5 . . ?
H8A1 C8A H8A3 109.5 . . ?
H8A2 C8A H8A3 109.5 . . ?
C13B C14B C15B 121.4(3) . . ?
C13B C14B H14B 119.3 . . ?
C15B C14B H14B 119.3 . . ?
C11B C16B H16A 109.5 . . ?
C11B C16B H16B 109.5 . . ?
H16A C16B H16B 109.5 . . ?
C11B C16B H16C 109.5 . . ?
H16A C16B H16C 109.5 . . ?
H16B C16B H16C 109.5 . . ?
C2A C7A H7A1 109.5 . . ?
C2A C7A H7A2 109.5 . . ?
H7A1 C7A H7A2 109.5 . . ?
C2A C7A H7A3 109.5 . . ?
H7A1 C7A H7A3 109.5 . . ?
H7A2 C7A H7A3 109.5 . . ?
C2B C7B H7B1 109.5 . . ?
C2B C7B H7B2 109.5 . . ?
H7B1 C7B H7B2 109.5 . . ?
C2B C7B H7B3 109.5 . . ?
H7B1 C7B H7B3 109.5 . . ?
H7B2 C7B H7B3 109.5 . . ?
N1A Au1A P1A 170.54(7) . . ?
C30A P1A C24A 103.79(13) . . ?
C30A P1A C18A 108.71(13) . . ?
C24A P1A C18A 105.14(13) . . ?
C30A P1A Au1A 111.64(10) . . ?
C24A P1A Au1A 115.72(10) . . ?
C18A P1A Au1A 111.30(10) . . ?
C9A N1A C1A 118.0(2) . . ?
C9A N1A Au1A 128.8(2) . . ?
C1A N1A Au1A 113.17(18) . . ?
C9A N2A C10A 120.5(3) . . ?
C2A C1A C6A 120.5(3) . . ?
C2A C1A N1A 119.3(3) . . ?
C6A C1A N1A 120.1(3) . . ?
C3A C2A C1A 118.7(3) . . ?
C3A C2A C7A 120.4(3) . . ?
C1A C2A C7A 120.8(3) . . ?
C4A C3A C2A 121.0(3) . . ?
C4A C3A H3A 119.5 . . ?
C2A C3A H3A 119.5 . . ?
C3A C4A C5A 119.9(3) . . ?
C3A C4A H4A 120.0 . . ?
C5A C4A H4A 120.0 . . ?
C4A C5A C6A 120.8(3) . . ?
C4A C5A H5A 119.6 . . ?
C6A C5A H5A 119.6 . . ?
C5A C6A C1A 118.9(3) . . ?
C5A C6A C8A 120.9(3) . . ?
C1A C6A C8A 120.2(3) . . ?
N2A C9A N1A 130.0(3) . . ?
N2A C9A H9A 115.0 . . ?
N1A C9A H9A 115.0 . . ?
C15A C10A C11A 120.6(3) . . ?
C15A C10A N2A 119.9(3) . . ?
C11A C10A N2A 119.2(3) . . ?
C12A C11A C10A 118.8(3) . . ?
C12A C11A C16A 120.6(3) . . ?
C10A C11A C16A 120.6(3) . . ?
C13A C12A C11A 121.2(4) . . ?
C13A C12A H12A 119.4 . . ?
C11A C12A H12A 119.4 . . ?
C12A C13A C14A 120.2(3) . . ?
C12A C13A H13A 119.9 . . ?
C14A C13A H13A 119.9 . . ?
C13A C14A C15A 120.5(3) . . ?
C13A C14A H14A 119.7 . . ?
C15A C14A H14A 119.7 . . ?
C14A C15A C10A 118.6(3) . . ?
C14A C15A C17A 121.4(3) . . ?
C10A C15A C17A 120.0(3) . . ?
C11A C16A H16D 109.5 . . ?
C11A C16A H16E 109.5 . . ?
H16D C16A H16E 109.5 . . ?
C11A C16A H16F 109.5 . . ?
H16D C16A H16F 109.5 . . ?
H16E C16A H16F 109.5 . . ?
C15A C17A H17A 109.5 . . ?
C15A C17A H17B 109.5 . . ?
H17A C17A H17B 109.5 . . ?
C15A C17A H17C 109.5 . . ?
H17A C17A H17C 109.5 . . ?
H17B C17A H17C 109.5 . . ?
C23A C18A C19A 119.2(3) . . ?
C23A C18A P1A 122.0(2) . . ?
C19A C18A P1A 118.8(2) . . ?
C20A C19A C18A 120.5(3) . . ?
C20A C19A H19A 119.8 . . ?
C18A C19A H19A 119.8 . . ?
C19A C20A C21A 119.9(3) . . ?
C19A C20A H20A 120.0 . . ?
C21A C20A H20A 120.0 . . ?
C22A C21A C20A 119.7(3) . . ?
C22A C21A H21A 120.2 . . ?
C20A C21A H21A 120.2 . . ?
C21A C22A C23A 120.8(3) . . ?
C21A C22A H22A 119.6 . . ?
C23A C22A H22A 119.6 . . ?
C18A C23A C22A 120.0(3) . . ?
C18A C23A H23A 120.0 . . ?
C22A C23A H23A 120.0 . . ?
C29A C24A C25A 119.0(3) . . ?
C29A C24A P1A 122.6(2) . . ?
C25A C24A P1A 118.3(2) . . ?
C24A C25A C26A 120.1(3) . . ?
C24A C25A H25A 119.9 . . ?
C26A C25A H25A 119.9 . . ?
C27A C26A C25A 120.1(3) . . ?
C27A C26A H26A 119.9 . . ?
C25A C26A H26A 119.9 . . ?
C26A C27A C28A 120.0(3) . . ?
C26A C27A H27A 120.0 . . ?
C28A C27A H27A 120.0 . . ?
C27A C28A C29A 119.7(3) . . ?
C27A C28A H28A 120.1 . . ?
C29A C28A H28A 120.1 . . ?
C24A C29A C28A 121.0(3) . . ?
C24A C29A H29A 119.5 . . ?
C28A C29A H29A 119.5 . . ?
C35A C30A C31A 118.9(3) . . ?
C35A C30A P1A 125.7(2) . . ?
C31A C30A P1A 115.3(2) . . ?
C32A C31A C30A 120.4(3) . . ?
C32A C31A H31A 119.8 . . ?
C30A C31A H31A 119.8 . . ?
C33A C32A C31A 119.9(3) . . ?
C33A C32A H32A 120.0 . . ?
C31A C32A H32A 120.0 . . ?
C34A C33A C32A 119.8(3) . . ?
C34A C33A H33A 120.1 . . ?
C32A C33A H33A 120.1 . . ?
C33A C34A C35A 120.8(3) . . ?
C33A C34A H34A 119.6 . . ?
C35A C34A H34A 119.6 . . ?
C34A C35A C30A 120.1(3) . . ?
C34A C35A H35A 119.9 . . ?
C30A C35A H35A 119.9 . . ?
N1B Au1B P1B 170.84(7) . . ?
C18B P1B C30B 109.58(13) . . ?
C18B P1B C24B 104.91(13) . . ?
C30B P1B C24B 104.01(13) . . ?
C18B P1B Au1B 111.44(10) . . ?
C30B P1B Au1B 110.55(10) . . ?
C24B P1B Au1B 115.91(10) . . ?
C9B N1B C1B 117.2(2) . . ?
C9B N1B Au1B 128.5(2) . . ?
C1B N1B Au1B 114.01(18) . . ?
C9B N2B C10B 121.2(3) . . ?
C2B C1B C6B 120.7(3) . . ?
C2B C1B N1B 119.3(3) . . ?
C6B C1B N1B 120.0(3) . . ?
C3B C2B C1B 118.7(3) . . ?
C3B C2B C7B 120.2(3) . . ?
C1B C2B C7B 121.0(3) . . ?
C2B C3B C4B 121.2(3) . . ?
C2B C3B H3B 119.4 . . ?
C4B C3B H3B 119.4 . . ?
C5B C4B C3B 119.4(3) . . ?
C5B C4B H4B 120.3 . . ?
C3B C4B H4B 120.3 . . ?
C4B C5B C6B 121.2(3) . . ?
C4B C5B H5B 119.4 . . ?
C6B C5B H5B 119.4 . . ?
C5B C6B C1B 118.7(3) . . ?
C5B C6B C8B 120.9(3) . . ?
C1B C6B C8B 120.4(3) . . ?
C6B C8B H8B1 109.5 . . ?
C6B C8B H8B2 109.5 . . ?
H8B1 C8B H8B2 109.5 . . ?
C6B C8B H8B3 109.5 . . ?
H8B1 C8B H8B3 109.5 . . ?
H8B2 C8B H8B3 109.5 . . ?
N2B C9B N1B 129.6(3) . . ?
N2B C9B H9B 115.2 . . ?
N1B C9B H9B 115.2 . . ?
C15B C10B C11B 120.1(3) . . ?
C15B C10B N2B 119.5(3) . . ?
C11B C10B N2B 120.1(3) . . ?
C12B C11B C10B 118.5(3) . . ?
C12B C11B C16B 121.4(3) . . ?
C10B C11B C16B 120.1(3) . . ?
C13B C12B C11B 121.8(3) . . ?
C13B C12B H12B 119.1 . . ?
C11B C12B H12B 119.1 . . ?
C12B C13B C14B 119.2(3) . . ?
C12B C13B H13B 120.4 . . ?
C14B C13B H13B 120.4 . . ?
C14B C15B C10B 118.9(3) . . ?
C14B C15B C17B 121.5(3) . . ?
C10B C15B C17B 119.5(3) . . ?
C15B C17B H17D 109.5 . . ?
C15B C17B H17E 109.5 . . ?
H17D C17B H17E 109.5 . . ?
C15B C17B H17F 109.5 . . ?
H17D C17B H17F 109.5 . . ?
H17E C17B H17F 109.5 . . ?
C19B C18B C23B 119.1(3) . . ?
C19B C18B P1B 118.8(2) . . ?
C23B C18B P1B 122.1(2) . . ?
C18B C19B C20B 120.6(3) . . ?
C18B C19B H19B 119.7 . . ?
C20B C19B H19B 119.7 . . ?
C21B C20B C19B 120.2(3) . . ?
C21B C20B H20B 119.9 . . ?
C19B C20B H20B 119.9 . . ?
C22B C21B C20B 119.3(3) . . ?
C22B C21B H21B 120.4 . . ?
C20B C21B H21B 120.4 . . ?
C21B C22B C23B 120.7(3) . . ?
C21B C22B H22B 119.6 . . ?
C23B C22B H22B 119.6 . . ?
C22B C23B C18B 120.2(3) . . ?
C22B C23B H23B 119.9 . . ?
C18B C23B H23B 119.9 . . ?
C29B C24B C25B 119.1(3) . . ?
C29B C24B P1B 122.6(2) . . ?
C25B C24B P1B 118.3(2) . . ?
C24B C25B C26B 120.4(3) . . ?
C24B C25B H25B 119.8 . . ?
C26B C25B H25B 119.8 . . ?
C27B C26B C25B 119.9(3) . . ?
C27B C26B H26B 120.1 . . ?
C25B C26B H26B 120.1 . . ?
C28B C27B C26B 120.1(3) . . ?
C28B C27B H27B 119.9 . . ?
C26B C27B H27B 119.9 . . ?
C27B C28B C29B 119.9(3) . . ?
C27B C28B H28B 120.1 . . ?
C29B C28B H28B 120.1 . . ?
C24B C29B C28B 120.6(3) . . ?
C24B C29B H29B 119.7 . . ?
C28B C29B H29B 119.7 . . ?
C31B C30B C35B 119.4(3) . . ?
C31B C30B P1B 115.7(2) . . ?
C35B C30B P1B 124.9(2) . . ?
C32B C31B C30B 120.2(3) . . ?
C32B C31B H31B 119.9 . . ?
C30B C31B H31B 119.9 . . ?
C33B C32B C31B 120.6(3) . . ?
C33B C32B H32B 119.7 . . ?
C31B C32B H32B 119.7 . . ?
C32B C33B C34B 119.2(3) . . ?
C32B C33B H33B 120.4 . . ?
C34B C33B H33B 120.4 . . ?
C33B C34B C35B 121.0(3) . . ?
C33B C34B H34B 119.5 . . ?
C35B C34B H34B 119.5 . . ?
C30B C35B C34B 119.5(3) . . ?
C30B C35B H35B 120.2 . . ?
C34B C35B H35B 120.2 . . ?

loop_
_geom_torsion_atom_site_label_1
_geom_torsion_atom_site_label_2
_geom_torsion_atom_site_label_3
_geom_torsion_atom_site_label_4
_geom_torsion
_geom_torsion_site_symmetry_1
_geom_torsion_site_symmetry_2
_geom_torsion_site_symmetry_3
_geom_torsion_site_symmetry_4
_geom_torsion_publ_flag
C9A N1A C1A C2A -93.3(3) . . . . ?
Au1A N1A C1A C2A 87.5(3) . . . . ?
C9A N1A C1A C6A 88.9(3) . . . . ?
Au1A N1A C1A C6A -90.4(3) . . . . ?
C6A C1A C2A C3A -0.6(4) . . . . ?
N1A C1A C2A C3A -178.4(3) . . . . ?
C6A C1A C2A C7A 178.8(3) . . . . ?
N1A C1A C2A C7A 1.0(4) . . . . ?
C1A C2A C3A C4A 0.4(4) . . . . ?
C7A C2A C3A C4A -179.0(3) . . . . ?
C2A C3A C4A C5A 0.4(5) . . . . ?
C3A C4A C5A C6A -0.9(5) . . . . ?
C4A C5A C6A C1A 0.7(5) . . . . ?
C4A C5A C6A C8A -179.2(3) . . . . ?
C2A C1A C6A C5A 0.1(5) . . . . ?
N1A C1A C6A C5A 177.9(3) . . . . ?
C2A C1A C6A C8A 180.0(3) . . . . ?
N1A C1A C6A C8A -2.2(4) . . . . ?
C10A N2A C9A N1A 2.2(5) . . . . ?
C1A N1A C9A N2A 178.1(3) . . . . ?
Au1A N1A C9A N2A -2.8(5) . . . . ?
C9A N2A C10A C15A 88.6(4) . . . . ?
C9A N2A C10A C11A -97.6(4) . . . . ?
C15A C10A C11A C12A 1.0(5) . . . . ?
N2A C10A C11A C12A -172.7(3) . . . . ?
C15A C10A C11A C16A -178.1(3) . . . . ?
N2A C10A C11A C16A 8.1(5) . . . . ?
C10A C11A C12A C13A 0.8(5) . . . . ?
C16A C11A C12A C13A 179.9(3) . . . . ?
C11A C12A C13A C14A -1.3(6) . . . . ?
C12A C13A C14A C15A 0.0(5) . . . . ?
C13A C14A C15A C10A 1.7(5) . . . . ?
C13A C14A C15A C17A -178.0(3) . . . . ?
C11A C10A C15A C14A -2.3(5) . . . . ?
N2A C10A C15A C14A 171.4(3) . . . . ?
C11A C10A C15A C17A 177.5(3) . . . . ?
N2A C10A C15A C17A -8.8(5) . . . . ?
C30A P1A C18A C23A 72.8(3) . . . . ?
C24A P1A C18A C23A -37.8(3) . . . . ?
Au1A P1A C18A C23A -163.9(2) . . . . ?
C30A P1A C18A C19A -110.7(2) . . . . ?
C24A P1A C18A C19A 138.7(2) . . . . ?
Au1A P1A C18A C19A 12.6(2) . . . . ?
C23A C18A C19A C20A 0.9(4) . . . . ?
P1A C18A C19A C20A -175.7(2) . . . . ?
C18A C19A C20A C21A -0.3(4) . . . . ?
C19A C20A C21A C22A -0.5(4) . . . . ?
C20A C21A C22A C23A 0.6(4) . . . . ?
C19A C18A C23A C22A -0.8(4) . . . . ?
P1A C18A C23A C22A 175.7(2) . . . . ?
C21A C22A C23A C18A 0.0(4) . . . . ?
C30A P1A C24A C29A -19.9(3) . . . . ?
C18A P1A C24A C29A 94.2(3) . . . . ?
Au1A P1A C24A C29A -142.6(3) . . . . ?
C30A P1A C24A C25A 159.4(2) . . . . ?
C18A P1A C24A C25A -86.5(3) . . . . ?
Au1A P1A C24A C25A 36.7(3) . . . . ?
C29A C24A C25A C26A -1.3(5) . . . . ?
P1A C24A C25A C26A 179.4(3) . . . . ?
C24A C25A C26A C27A 0.5(5) . . . . ?
C25A C26A C27A C28A 0.9(6) . . . . ?
C26A C27A C28A C29A -1.5(6) . . . . ?
C25A C24A C29A C28A 0.7(6) . . . . ?
P1A C24A C29A C28A 180.0(3) . . . . ?
C27A C28A C29A C24A 0.7(6) . . . . ?
C24A P1A C30A C35A 100.0(3) . . . . ?
C18A P1A C30A C35A -11.5(3) . . . . ?
Au1A P1A C30A C35A -134.7(2) . . . . ?
C24A P1A C30A C31A -78.3(3) . . . . ?
C18A P1A C30A C31A 170.2(2) . . . . ?
Au1A P1A C30A C31A 47.0(3) . . . . ?
C35A C30A C31A C32A -1.5(5) . . . . ?
P1A C30A C31A C32A 177.0(3) . . . . ?
C30A C31A C32A C33A 1.1(6) . . . . ?
C31A C32A C33A C34A 0.3(6) . . . . ?
C32A C33A C34A C35A -1.4(5) . . . . ?
C33A C34A C35A C30A 1.1(5) . . . . ?
C31A C30A C35A C34A 0.4(5) . . . . ?
P1A C30A C35A C34A -177.9(2) . . . . ?
C9B N1B C1B C2B -100.0(3) . . . . ?
Au1B N1B C1B C2B 86.1(3) . . . . ?
C9B N1B C1B C6B 81.4(3) . . . . ?
Au1B N1B C1B C6B -92.4(3) . . . . ?
C6B C1B C2B C3B 0.4(4) . . . . ?
N1B C1B C2B C3B -178.1(2) . . . . ?
C6B C1B C2B C7B -179.8(3) . . . . ?
N1B C1B C2B C7B 1.7(4) . . . . ?
C1B C2B C3B C4B -0.7(4) . . . . ?
C7B C2B C3B C4B 179.5(3) . . . . ?
C2B C3B C4B C5B 0.9(5) . . . . ?
C3B C4B C5B C6B -0.8(5) . . . . ?
C4B C5B C6B C1B 0.5(5) . . . . ?
C4B C5B C6B C8B -179.9(3) . . . . ?
C2B C1B C6B C5B -0.3(5) . . . . ?
N1B C1B C6B C5B 178.2(3) . . . . ?
C2B C1B C6B C8B -179.9(3) . . . . ?
N1B C1B C6B C8B -1.4(4) . . . . ?
C10B N2B C9B N1B 1.9(5) . . . . ?
C1B N1B C9B N2B -179.8(3) . . . . ?
Au1B N1B C9B N2B -7.0(5) . . . . ?
C9B N2B C10B C15B 91.9(4) . . . . ?
C9B N2B C10B C11B -94.1(4) . . . . ?
C15B C10B C11B C12B 1.6(4) . . . . ?
N2B C10B C11B C12B -172.4(3) . . . . ?
C15B C10B C11B C16B -177.7(3) . . . . ?
N2B C10B C11B C16B 8.4(4) . . . . ?
C10B C11B C12B C13B 0.2(5) . . . . ?
C16B C11B C12B C13B 179.4(3) . . . . ?
C11B C12B C13B C14B -0.9(5) . . . . ?
C15B C14B C13B C12B -0.2(5) . . . . ?
C13B C14B C15B C10B 1.9(5) . . . . ?
C13B C14B C15B C17B -176.6(3) . . . . ?
C11B C10B C15B C14B -2.6(4) . . . . ?
N2B C10B C15B C14B 171.4(3) . . . . ?
C11B C10B C15B C17B 175.9(3) . . . . ?
N2B C10B C15B C17B -10.1(4) . . . . ?
C30B P1B C18B C19B -109.4(2) . . . . ?
C24B P1B C18B C19B 139.4(2) . . . . ?
Au1B P1B C18B C19B 13.3(2) . . . . ?
C30B P1B C18B C23B 74.3(3) . . . . ?
C24B P1B C18B C23B -36.8(3) . . . . ?
Au1B P1B C18B C23B -163.0(2) . . . . ?
C23B C18B C19B C20B 0.8(4) . . . . ?
P1B C18B C19B C20B -175.5(2) . . . . ?
C18B C19B C20B C21B -0.3(4) . . . . ?
C19B C20B C21B C22B -0.8(4) . . . . ?
C20B C21B C22B C23B 1.3(4) . . . . ?
C21B C22B C23B C18B -0.8(4) . . . . ?
C19B C18B C23B C22B -0.3(4) . . . . ?
P1B C18B C23B C22B 176.0(2) . . . . ?
C18B P1B C24B C29B 97.5(3) . . . . ?
C30B P1B C24B C29B -17.6(3) . . . . ?
Au1B P1B C24B C29B -139.2(3) . . . . ?
C18B P1B C24B C25B -84.4(3) . . . . ?
C30B P1B C24B C25B 160.5(2) . . . . ?
Au1B P1B C24B C25B 39.0(3) . . . . ?
C29B C24B C25B C26B -2.9(5) . . . . ?
P1B C24B C25B C26B 178.9(3) . . . . ?
C24B C25B C26B C27B 1.2(5) . . . . ?
C25B C26B C27B C28B 1.0(6) . . . . ?
C26B C27B C28B C29B -1.4(6) . . . . ?
C25B C24B C29B C28B 2.5(6) . . . . ?
P1B C24B C29B C28B -179.4(3) . . . . ?
C27B C28B C29B C24B -0.4(6) . . . . ?
C18B P1B C30B C31B 167.2(2) . . . . ?
C24B P1B C30B C31B -81.1(3) . . . . ?
Au1B P1B C30B C31B 44.0(3) . . . . ?
C18B P1B C30B C35B -15.0(3) . . . . ?
C24B P1B C30B C35B 96.7(3) . . . . ?
Au1B P1B C30B C35B -138.3(2) . . . . ?
C35B C30B C31B C32B -1.0(5) . . . . ?
P1B C30B C31B C32B 176.9(3) . . . . ?
C30B C31B C32B C33B 1.0(5) . . . . ?
C31B C32B C33B C34B 0.2(5) . . . . ?
C32B C33B C34B C35B -1.4(5) . . . . ?
C31B C30B C35B C34B -0.1(5) . . . . ?
P1B C30B C35B C34B -177.8(2) . . . . ?
C33B C34B C35B C30B 1.3(5) . . . . ?

_refine_diff_density_max         1.269
_refine_diff_density_min         -0.846
_refine_diff_density_rms         0.101

_shelxl_version_number           2013-4

_diffrn_standards_decay_%        0.0


data_Au[PPh3][S2]

_audit_creation_method           SHELXL-2013
_chemical_name_systematic        ?
_chemical_name_common            ?
_chemical_formula_moiety         'C36 H48 Au N2  P S2, 0.5(C4 H8 O)'
_chemical_formula_sum            'C38 H38 Au N2 O0.50 P S2'
_chemical_melting_point          ?

_exptl_crystal_description       Plate
_exptl_crystal_colour            Yellow

_diffrn_ambient_temperature      100(2)
_chemical_formula_weight         822.76

loop_
_atom_type_symbol
_atom_type_description
_atom_type_scat_dispersion_real
_atom_type_scat_dispersion_imag
_atom_type_scat_source
C C 0.0033 0.0016 'International Tables Vol C Tables 4.2.6.8 and 6.1.1.4'
H H 0.0000 0.0000 'International Tables Vol C Tables 4.2.6.8 and 6.1.1.4'
Au Au -2.0133 8.8022 'International Tables Vol C Tables 4.2.6.8 and 6.1.1.4'
N N 0.0061 0.0033 'International Tables Vol C Tables 4.2.6.8 and 6.1.1.4'
O O 0.0106 0.0060 'International Tables Vol C Tables 4.2.6.8 and 6.1.1.4'
P P 0.1023 0.0942 'International Tables Vol C Tables 4.2.6.8 and 6.1.1.4'
S S 0.1246 0.1234 'International Tables Vol C Tables 4.2.6.8 and 6.1.1.4'

_space_group_crystal_system      monoclinic
_space_group_IT_number           15
_space_group_name_H-M_alt        'C 2/c'
_space_group_name_Hall           '-C 2yc'

_shelx_space_group_comment
;
The symmetry employed for this shelxl refinement is uniquely defined
by the following loop, which should always be used as a source of
symmetry information in preference to the above space-group names.
They are only intended as comments.
;

loop_
_space_group_symop_operation_xyz
'x, y, z'
'-x, y, -z+1/2'
'x+1/2, y+1/2, z'
'-x+1/2, y+1/2, -z+1/2'
'-x, -y, -z'
'x, -y, z-1/2'
'-x+1/2, -y+1/2, -z'
'x+1/2, -y+1/2, z-1/2'

_cell_length_a                   38.566(2)
_cell_length_b                   8.7877(5)
_cell_length_c                   27.0810(17)
_cell_angle_alpha                90
_cell_angle_beta                 129.4690(10)
_cell_angle_gamma                90
_cell_volume                     7085.0(7)
_cell_formula_units_Z            8
_cell_measurement_temperature    100(2)
_cell_measurement_reflns_used    9933
_cell_measurement_theta_min      2.4
_cell_measurement_theta_max      26.3
_exptl_crystal_density_meas      ?
_exptl_crystal_density_method    ?
_exptl_crystal_density_diffrn    1.543
_exptl_crystal_F_000             3280
_exptl_transmission_factor_min   ?
_exptl_transmission_factor_max   ?
_exptl_crystal_size_max          0.750
_exptl_crystal_size_mid          0.250
_exptl_crystal_size_min          0.100
_exptl_absorpt_coefficient_mu    4.346
_shelx_estimated_absorpt_T_min   0.139
_shelx_estimated_absorpt_T_max   0.670
_exptl_absorpt_correction_type   multi-scan
_exptl_absorpt_correction_T_min  0.47
_exptl_absorpt_correction_T_max  0.67
_exptl_absorpt_process_details
;
 Data were corrected for decay and absorption using the program SADABS
 (Sheldrick, G. M. (2003). SADABS. Version 2.10. University of
 G\"ottingen, Germany).
;

_exptl_special_details
;
 ?
;
_diffrn_radiation_probe          ?
_diffrn_radiation_type           MoK\a
_diffrn_radiation_wavelength     0.71073
_diffrn_source                   ?

_diffrn_measurement_device_type  'Bruker APEXII CCD area detector'
_diffrn_measurement_method       'omega scans'
_diffrn_detector_area_resol_mean ?
_diffrn_reflns_number            37432
_diffrn_reflns_av_unetI/netI     0.0301
_diffrn_reflns_av_R_equivalents  0.0398
_diffrn_reflns_limit_h_min       -48
_diffrn_reflns_limit_h_max       48
_diffrn_reflns_limit_k_min       -10
_diffrn_reflns_limit_k_max       10
_diffrn_reflns_limit_l_min       -33
_diffrn_reflns_limit_l_max       33
_diffrn_reflns_theta_min         1.948
_diffrn_reflns_theta_max         26.392
_diffrn_reflns_theta_full        25.242
_diffrn_measured_fraction_theta_max 0.999
_diffrn_measured_fraction_theta_full 1.000
_diffrn_reflns_Laue_measured_fraction_max 0.999
_diffrn_reflns_Laue_measured_fraction_full 1.000
_diffrn_reflns_point_group_measured_fraction_max 0.999
_diffrn_reflns_point_group_measured_fraction_full 1.000
_reflns_number_total             7242
_reflns_number_gt                6000
_reflns_threshold_expression     'I > 2\s(I)'
_reflns_Friedel_coverage         0.000
_reflns_Friedel_fraction_max     .
_reflns_Friedel_fraction_full    .

_reflns_special_details
;
 Reflections were merged by SHELXL according to the crystal
 class for the calculation of statistics and refinement.

 _reflns_Friedel_fraction is defined as the number of unique
 Friedel pairs measured divided by the number that would be
 possible theoretically, ignoring centric projections and
 systematic absences.
;

_computing_data_collection       'APEX2 (Bruker AXS, 2008)'
_computing_cell_refinement       'APEX2 (Bruker AXS, 2008)'
_computing_data_reduction        'APEX2 (Bruker AXS, 2008)'
_computing_structure_solution    'SHELXS-2013 (Sheldrick, 2013)'
_computing_structure_refinement  'SHELXL-2013 (Sheldrick, 2013)'
_computing_molecular_graphics    'X-SEED, Barbour, 2001'
_computing_publication_material  'CIFTAB (Sheldrick, 2013)'

_refine_special_details
;
 ?
;
_refine_ls_structure_factor_coef Fsqd
_refine_ls_matrix_type           full
_refine_ls_weighting_scheme      calc
_refine_ls_weighting_details
'w=1/[\s^2^(Fo^2^)+(0.0248P)^2^+7.1953P] where P=(Fo^2^+2Fc^2^)/3'
_atom_sites_solution_primary     ?
_atom_sites_solution_secondary   ?
_atom_sites_solution_hydrogens   geom
_refine_ls_hydrogen_treatment    constr
_refine_ls_extinction_method     none
_refine_ls_extinction_coef       .
_refine_ls_number_reflns         7242
_refine_ls_number_parameters     406
_refine_ls_number_restraints     0
_refine_ls_R_factor_all          0.0345
_refine_ls_R_factor_gt           0.0231
_refine_ls_wR_factor_ref         0.0535
_refine_ls_wR_factor_gt          0.0497
_refine_ls_goodness_of_fit_ref   1.025
_refine_ls_restrained_S_all      1.025
_refine_ls_shift/su_max          0.001
_refine_ls_shift/su_mean         0.000

loop_
_atom_site_label
_atom_site_type_symbol
_atom_site_fract_x
_atom_site_fract_y
_atom_site_fract_z
_atom_site_U_iso_or_equiv
_atom_site_adp_type
_atom_site_occupancy
_atom_site_site_symmetry_order
_atom_site_calc_flag
_atom_site_refinement_flags_posn
_atom_site_refinement_flags_adp
_atom_site_refinement_flags_occupancy
_atom_site_disorder_assembly
_atom_site_disorder_group
Au1 Au 0.68217(2) 0.38937(2) 0.49846(2) 0.02282(4) Uani 1 1 d . . . . .
S1 S 0.59762(3) 0.27622(10) 0.47586(4) 0.0315(2) Uani 1 1 d . . . . .
S3 S 0.69090(3) 0.35296(10) 0.59103(4) 0.02823(19) Uani 1 1 d . . . . .
P4 P 0.67872(3) 0.44383(9) 0.41440(4) 0.01993(16) Uani 1 1 d . . . . .
N2 N 0.62530(8) 0.3088(3) 0.59483(11) 0.0210(5) Uani 1 1 d . . . . .
N3 N 0.57404(8) 0.2752(3) 0.61156(12) 0.0267(6) Uani 1 1 d . . . . .
C1 C 0.63532(10) 0.3108(3) 0.55408(14) 0.0217(6) Uani 1 1 d . . . . .
C2 C 0.58245(10) 0.2752(3) 0.57358(15) 0.0234(7) Uani 1 1 d . . . . .
H2 H 0.5592 0.2520 0.5297 0.028 Uiso 1 1 calc R U . . .
C3 C 0.65986(10) 0.3442(4) 0.66223(14) 0.0223(7) Uani 1 1 d . . . . .
C4 C 0.68529(10) 0.2250(4) 0.70422(15) 0.0270(7) Uani 1 1 d . . . . .
C5 C 0.71900(11) 0.2611(4) 0.76856(16) 0.0345(8) Uani 1 1 d . . . . .
H5 H 0.7370 0.1824 0.7985 0.041 Uiso 1 1 calc R U . . .
C6 C 0.72643(12) 0.4097(4) 0.78889(17) 0.0406(9) Uani 1 1 d . . . . .
H6 H 0.7495 0.4328 0.8328 0.049 Uiso 1 1 calc R U . . .
C7 C 0.70072(12) 0.5254(4) 0.74619(16) 0.0371(9) Uani 1 1 d . . . . .
H7 H 0.7064 0.6275 0.7611 0.045 Uiso 1 1 calc R U . . .
C8 C 0.66654(11) 0.4954(4) 0.68164(15) 0.0279(7) Uani 1 1 d . . . . .
C9 C 0.63889(12) 0.6226(4) 0.63446(17) 0.0385(9) Uani 1 1 d . . . . .
H9A H 0.6472 0.6363 0.6073 0.058 Uiso 1 1 calc R U . . .
H9B H 0.6446 0.7172 0.6578 0.058 Uiso 1 1 calc R U . . .
H9C H 0.6069 0.5969 0.6077 0.058 Uiso 1 1 calc R U . . .
C10 C 0.67668(12) 0.0642(4) 0.68060(17) 0.0344(8) Uani 1 1 d . . . . .
H10A H 0.6478 0.0300 0.6678 0.052 Uiso 1 1 calc R U . . .
H10B H 0.7007 -0.0016 0.7148 0.052 Uiso 1 1 calc R U . . .
H10C H 0.6759 0.0590 0.6438 0.052 Uiso 1 1 calc R U . . .
C11 C 0.52917(10) 0.2411(4) 0.58643(14) 0.0274(7) Uani 1 1 d . . . . .
C12 C 0.50137(11) 0.3616(4) 0.57444(15) 0.0310(8) Uani 1 1 d . . . . .
C13 C 0.45843(11) 0.3278(5) 0.55346(16) 0.0393(9) Uani 1 1 d . . . . .
H13 H 0.4385 0.4084 0.5437 0.047 Uiso 1 1 calc R U . . .
C14 C 0.44463(12) 0.1794(5) 0.54673(17) 0.0441(10) Uani 1 1 d . . . . .
H14 H 0.4153 0.1580 0.5321 0.053 Uiso 1 1 calc R U . . .
C15 C 0.47330(12) 0.0624(5) 0.56115(17) 0.0397(9) Uani 1 1 d . . . . .
H15 H 0.4636 -0.0395 0.5571 0.048 Uiso 1 1 calc R U . . .
C16 C 0.51635(12) 0.0892(4) 0.58166(16) 0.0331(8) Uani 1 1 d . . . . .
C17 C 0.51708(12) 0.5243(4) 0.58437(17) 0.0380(9) Uani 1 1 d . . . . .
H17A H 0.5222 0.5492 0.5542 0.057 Uiso 1 1 calc R U . . .
H17B H 0.5451 0.5371 0.6282 0.057 Uiso 1 1 calc R U . . .
H17C H 0.4941 0.5924 0.5772 0.057 Uiso 1 1 calc R U . . .
C18 C 0.54809(13) -0.0397(4) 0.59934(19) 0.0422(9) Uani 1 1 d . . . . .
H18A H 0.5548 -0.0412 0.5700 0.063 Uiso 1 1 calc R U . . .
H18B H 0.5341 -0.1363 0.5963 0.063 Uiso 1 1 calc R U . . .
H18C H 0.5760 -0.0254 0.6432 0.063 Uiso 1 1 calc R U . . .
C19 C 0.72751(10) 0.5469(3) 0.43622(13) 0.0201(6) Uani 1 1 d . . . . .
C20 C 0.76938(11) 0.4790(4) 0.47622(16) 0.0324(8) Uani 1 1 d . . . . .
H20 H 0.7723 0.3798 0.4924 0.039 Uiso 1 1 calc R U . . .
C21 C 0.80686(11) 0.5535(4) 0.49284(17) 0.0389(9) Uani 1 1 d . . . . .
H21 H 0.8353 0.5049 0.5198 0.047 Uiso 1 1 calc R U . . .
C22 C 0.80323(11) 0.6989(4) 0.47045(17) 0.0337(8) Uani 1 1 d . . . . .
H22 H 0.8290 0.7496 0.4812 0.040 Uiso 1 1 calc R U . . .
C23 C 0.76189(11) 0.7695(4) 0.43244(14) 0.0285(7) Uani 1 1 d . . . . .
H23 H 0.7595 0.8708 0.4182 0.034 Uiso 1 1 calc R U . . .
C24 C 0.72392(10) 0.6948(3) 0.41474(14) 0.0240(7) Uani 1 1 d . . . . .
H24 H 0.6955 0.7440 0.3881 0.029 Uiso 1 1 calc R U . . .
C25 C 0.62995(10) 0.5559(3) 0.35320(14) 0.0226(7) Uani 1 1 d . . . . .
C26 C 0.62010(11) 0.5791(3) 0.29453(15) 0.0290(7) Uani 1 1 d . . . . .
H26 H 0.6387 0.5351 0.2866 0.035 Uiso 1 1 calc R U . . .
C27 C 0.58325(11) 0.6664(4) 0.24770(16) 0.0353(8) Uani 1 1 d . . . . .
H27 H 0.5766 0.6833 0.2078 0.042 Uiso 1 1 calc R U . . .
C28 C 0.55628(11) 0.7286(4) 0.25950(18) 0.0423(10) Uani 1 1 d . . . . .
H28 H 0.5309 0.7879 0.2275 0.051 Uiso 1 1 calc R U . . .
C29 C 0.56576(11) 0.7054(4) 0.31721(19) 0.0399(9) Uani 1 1 d . . . . .
H29 H 0.5470 0.7491 0.3249 0.048 Uiso 1 1 calc R U . . .
C30 C 0.60262(11) 0.6184(4) 0.36434(16) 0.0311(7) Uani 1 1 d . . . . .
H30 H 0.6090 0.6019 0.4041 0.037 Uiso 1 1 calc R U . . .
C31 C 0.67313(10) 0.2734(3) 0.37176(14) 0.0214(6) Uani 1 1 d . . . . .
C32 C 0.69940(10) 0.2410(4) 0.35486(14) 0.0253(7) Uani 1 1 d . . . . .
H32 H 0.7230 0.3081 0.3670 0.030 Uiso 1 1 calc R U . . .
C33 C 0.69131(11) 0.1100(4) 0.32000(15) 0.0302(7) Uani 1 1 d . . . . .
H33 H 0.7095 0.0879 0.3086 0.036 Uiso 1 1 calc R U . . .
C34 C 0.65738(12) 0.0130(4) 0.30212(16) 0.0339(8) Uani 1 1 d . . . . .
H34 H 0.6516 -0.0751 0.2776 0.041 Uiso 1 1 calc R U . . .
C35 C 0.63155(14) 0.0434(4) 0.3198(2) 0.0462(10) Uani 1 1 d . . . . .
H35 H 0.6081 -0.0244 0.3078 0.055 Uiso 1 1 calc R U . . .
C36 C 0.63969(12) 0.1726(4) 0.35499(18) 0.0384(9) Uani 1 1 d . . . . .
H36 H 0.6222 0.1921 0.3677 0.046 Uiso 1 1 calc R U . . .
O1S O 0.5000 1.0615(5) 0.2500 0.0969(19) Uani 1 2 d S T P . .
C1S C 0.49550(16) 1.1511(5) 0.2044(2) 0.0624(13) Uani 1 1 d . . . . .
H1S1 H 0.4651 1.1388 0.1627 0.075 Uiso 1 1 calc R U . . .
H1S2 H 0.5177 1.1203 0.1993 0.075 Uiso 1 1 calc R U . . .
C2S C 0.5029(2) 1.3107(5) 0.2252(3) 0.0764(15) Uani 1 1 d . . . . .
H2S1 H 0.4806 1.3783 0.1891 0.092 Uiso 1 1 calc R U . . .
H2S2 H 0.5334 1.3446 0.2436 0.092 Uiso 1 1 calc R U . . .

loop_
_atom_site_aniso_label
_atom_site_aniso_U_11
_atom_site_aniso_U_22
_atom_site_aniso_U_33
_atom_site_aniso_U_23
_atom_site_aniso_U_13
_atom_site_aniso_U_12
Au1 0.02724(7) 0.02705(7) 0.01930(7) 0.00132(5) 0.01720(6) -0.00036(6)
S1 0.0293(4) 0.0448(5) 0.0223(4) -0.0068(4) 0.0173(4) -0.0102(4)
S3 0.0244(4) 0.0447(5) 0.0193(4) -0.0001(3) 0.0156(3) -0.0046(4)
P4 0.0225(4) 0.0221(4) 0.0172(4) 0.0017(3) 0.0135(3) 0.0006(3)
N2 0.0215(13) 0.0241(14) 0.0191(13) -0.0017(11) 0.0138(11) -0.0029(11)
N3 0.0274(14) 0.0332(15) 0.0237(14) -0.0017(11) 0.0183(13) -0.0048(12)
C1 0.0241(16) 0.0207(16) 0.0230(16) 0.0019(13) 0.0162(14) -0.0009(13)
C2 0.0249(16) 0.0219(16) 0.0206(16) -0.0019(12) 0.0131(14) -0.0031(13)
C3 0.0233(16) 0.0295(17) 0.0226(16) -0.0017(13) 0.0185(14) -0.0045(13)
C4 0.0286(17) 0.0358(19) 0.0265(17) 0.0034(14) 0.0222(15) 0.0000(14)
C5 0.0287(18) 0.053(2) 0.0248(18) 0.0054(16) 0.0183(16) -0.0052(17)
C6 0.035(2) 0.065(3) 0.0224(18) -0.0068(18) 0.0188(17) -0.0211(19)
C7 0.045(2) 0.046(2) 0.033(2) -0.0135(17) 0.0304(18) -0.0188(18)
C8 0.0322(18) 0.0316(18) 0.0282(17) -0.0059(14) 0.0230(16) -0.0072(14)
C9 0.045(2) 0.0284(19) 0.043(2) -0.0054(16) 0.0288(19) -0.0049(16)
C10 0.039(2) 0.0326(19) 0.035(2) 0.0082(15) 0.0249(18) 0.0085(16)
C11 0.0248(17) 0.041(2) 0.0186(16) -0.0058(14) 0.0148(14) -0.0103(15)
C12 0.0279(17) 0.044(2) 0.0225(17) 0.0003(14) 0.0167(15) -0.0024(15)
C13 0.0265(18) 0.057(2) 0.031(2) 0.0032(18) 0.0170(17) -0.0004(17)
C14 0.031(2) 0.067(3) 0.039(2) -0.006(2) 0.0242(18) -0.014(2)
C15 0.040(2) 0.051(2) 0.034(2) -0.0153(17) 0.0264(18) -0.0247(18)
C16 0.0344(19) 0.043(2) 0.0268(18) -0.0095(15) 0.0216(16) -0.0119(16)
C17 0.034(2) 0.040(2) 0.041(2) 0.0054(17) 0.0247(18) 0.0036(16)
C18 0.049(2) 0.034(2) 0.051(2) -0.0082(18) 0.036(2) -0.0119(18)
C19 0.0237(16) 0.0220(15) 0.0163(15) -0.0014(12) 0.0135(13) 0.0005(13)
C20 0.0264(18) 0.0263(19) 0.0346(19) 0.0039(15) 0.0147(16) 0.0022(14)
C21 0.0224(18) 0.0327(19) 0.047(2) -0.0024(17) 0.0151(18) 0.0006(15)
C22 0.0329(19) 0.034(2) 0.038(2) -0.0149(16) 0.0241(17) -0.0138(16)
C23 0.0361(19) 0.0236(17) 0.0223(17) -0.0001(13) 0.0169(16) -0.0043(14)
C24 0.0256(16) 0.0269(18) 0.0184(15) -0.0009(13) 0.0134(14) 0.0009(13)
C25 0.0225(16) 0.0205(15) 0.0208(16) -0.0008(13) 0.0118(14) -0.0025(13)
C26 0.0308(18) 0.0248(18) 0.0240(17) -0.0017(13) 0.0140(15) -0.0013(14)
C27 0.0337(19) 0.0303(18) 0.0221(17) 0.0022(15) 0.0085(16) -0.0074(16)
C28 0.0200(17) 0.032(2) 0.042(2) 0.0100(17) 0.0039(17) -0.0028(15)
C29 0.0238(18) 0.037(2) 0.056(3) 0.0013(18) 0.0241(19) 0.0020(15)
C30 0.0270(17) 0.0345(19) 0.0316(18) 0.0014(15) 0.0186(16) -0.0002(15)
C31 0.0250(16) 0.0203(15) 0.0181(15) 0.0030(12) 0.0134(14) 0.0023(13)
C32 0.0248(17) 0.0284(17) 0.0222(16) -0.0028(13) 0.0148(14) -0.0027(13)
C33 0.0332(18) 0.0330(18) 0.0259(17) -0.0011(15) 0.0195(15) 0.0036(15)
C34 0.043(2) 0.0236(18) 0.0290(18) -0.0016(14) 0.0201(17) 0.0013(15)
C35 0.056(3) 0.033(2) 0.062(3) -0.0132(19) 0.043(2) -0.0187(19)
C36 0.053(2) 0.0314(19) 0.054(2) -0.0121(18) 0.044(2) -0.0128(18)
O1S 0.198(6) 0.035(3) 0.098(4) 0.000 0.113(5) 0.000
C1S 0.074(3) 0.064(3) 0.053(3) 0.003(2) 0.042(3) 0.010(2)
C2S 0.104(4) 0.049(3) 0.089(4) 0.015(3) 0.068(4) 0.005(3)

_geom_special_details
;
 All esds (except the esd in the dihedral angle between two l.s. planes)
 are estimated using the full covariance matrix.  The cell esds are taken
 into account individually in the estimation of esds in distances, angles
 and torsion angles; correlations between esds in cell parameters are only
 used when they are defined by crystal symmetry.  An approximate (isotropic)
 treatment of cell esds is used for estimating esds involving l.s. planes.
;

loop_
_geom_bond_atom_site_label_1
_geom_bond_atom_site_label_2
_geom_bond_distance
_geom_bond_site_symmetry_2
_geom_bond_publ_flag
Au1 P4 2.2457(8) . ?
Au1 S3 2.3296(8) . ?
S1 C1 1.667(3) . ?
S3 C1 1.734(3) . ?
P4 C25 1.814(3) . ?
P4 C19 1.816(3) . ?
P4 C31 1.819(3) . ?
N2 C1 1.382(4) . ?
N2 C2 1.393(4) . ?
N2 C3 1.453(4) . ?
N3 C2 1.260(4) . ?
N3 C11 1.432(4) . ?
C2 H2 0.9500 . ?
C3 C4 1.391(4) . ?
C3 C8 1.391(4) . ?
C4 C5 1.395(4) . ?
C4 C10 1.499(5) . ?
C5 C6 1.375(5) . ?
C5 H5 0.9500 . ?
C6 C7 1.377(5) . ?
C6 H6 0.9500 . ?
C7 C8 1.390(5) . ?
C7 H7 0.9500 . ?
C8 C9 1.512(5) . ?
C9 H9A 0.9800 . ?
C9 H9B 0.9800 . ?
C9 H9C 0.9800 . ?
C10 H10A 0.9800 . ?
C10 H10B 0.9800 . ?
C10 H10C 0.9800 . ?
C11 C12 1.391(5) . ?
C11 C16 1.401(4) . ?
C12 C13 1.399(5) . ?
C12 C17 1.509(5) . ?
C13 C14 1.376(5) . ?
C13 H13 0.9500 . ?
C14 C15 1.372(6) . ?
C14 H14 0.9500 . ?
C15 C16 1.396(5) . ?
C15 H15 0.9500 . ?
C16 C18 1.505(5) . ?
C17 H17A 0.9800 . ?
C17 H17B 0.9800 . ?
C17 H17C 0.9800 . ?
C18 H18A 0.9800 . ?
C18 H18B 0.9800 . ?
C18 H18C 0.9800 . ?
C19 C20 1.383(4) . ?
C19 C24 1.394(4) . ?
C20 C21 1.376(5) . ?
C20 H20 0.9500 . ?
C21 C22 1.382(5) . ?
C21 H21 0.9500 . ?
C22 C23 1.379(5) . ?
C22 H22 0.9500 . ?
C23 C24 1.383(4) . ?
C23 H23 0.9500 . ?
C24 H24 0.9500 . ?
C25 C30 1.381(4) . ?
C25 C26 1.394(4) . ?
C26 C27 1.388(5) . ?
C26 H26 0.9500 . ?
C27 C28 1.380(5) . ?
C27 H27 0.9500 . ?
C28 C29 1.375(5) . ?
C28 H28 0.9500 . ?
C29 C30 1.389(5) . ?
C29 H29 0.9500 . ?
C30 H30 0.9500 . ?
C31 C32 1.381(4) . ?
C31 C36 1.382(4) . ?
C32 C33 1.393(4) . ?
C32 H32 0.9500 . ?
C33 C34 1.367(5) . ?
C33 H33 0.9500 . ?
C34 C35 1.378(5) . ?
C34 H34 0.9500 . ?
C35 C36 1.384(5) . ?
C35 H35 0.9500 . ?
C36 H36 0.9500 . ?
O1S C1S 1.380(5) . ?
O1S C1S 1.380(5) 2_655 ?
C1S C2S 1.470(6) . ?
C1S H1S1 0.9900 . ?
C1S H1S2 0.9900 . ?
C2S C2S 1.491(9) 2_655 ?
C2S H2S1 0.9900 . ?
C2S H2S2 0.9900 . ?

loop_
_geom_angle_atom_site_label_1
_geom_angle_atom_site_label_2
_geom_angle_atom_site_label_3
_geom_angle
_geom_angle_site_symmetry_1
_geom_angle_site_symmetry_3
_geom_angle_publ_flag
P4 Au1 S3 174.22(3) . . ?
C1 S3 Au1 97.37(10) . . ?
C25 P4 C19 106.53(14) . . ?
C25 P4 C31 103.38(14) . . ?
C19 P4 C31 107.32(14) . . ?
C25 P4 Au1 113.62(10) . . ?
C19 P4 Au1 113.27(10) . . ?
C31 P4 Au1 112.02(10) . . ?
C1 N2 C2 122.2(2) . . ?
C1 N2 C3 120.1(2) . . ?
C2 N2 C3 117.7(2) . . ?
C2 N3 C11 118.2(3) . . ?
N2 C1 S1 123.5(2) . . ?
N2 C1 S3 114.4(2) . . ?
S1 C1 S3 122.15(17) . . ?
N3 C2 N2 121.1(3) . . ?
N3 C2 H2 119.5 . . ?
N2 C2 H2 119.5 . . ?
C4 C3 C8 123.0(3) . . ?
C4 C3 N2 118.2(3) . . ?
C8 C3 N2 118.8(3) . . ?
C3 C4 C5 117.6(3) . . ?
C3 C4 C10 120.8(3) . . ?
C5 C4 C10 121.6(3) . . ?
C6 C5 C4 120.5(3) . . ?
C6 C5 H5 119.8 . . ?
C4 C5 H5 119.8 . . ?
C5 C6 C7 120.6(3) . . ?
C5 C6 H6 119.7 . . ?
C7 C6 H6 119.7 . . ?
C6 C7 C8 121.1(3) . . ?
C6 C7 H7 119.4 . . ?
C8 C7 H7 119.4 . . ?
C7 C8 C3 117.1(3) . . ?
C7 C8 C9 121.2(3) . . ?
C3 C8 C9 121.7(3) . . ?
C8 C9 H9A 109.5 . . ?
C8 C9 H9B 109.5 . . ?
H9A C9 H9B 109.5 . . ?
C8 C9 H9C 109.5 . . ?
H9A C9 H9C 109.5 . . ?
H9B C9 H9C 109.5 . . ?
C4 C10 H10A 109.5 . . ?
C4 C10 H10B 109.5 . . ?
H10A C10 H10B 109.5 . . ?
C4 C10 H10C 109.5 . . ?
H10A C10 H10C 109.5 . . ?
H10B C10 H10C 109.5 . . ?
C12 C11 C16 122.0(3) . . ?
C12 C11 N3 118.1(3) . . ?
C16 C11 N3 119.5(3) . . ?
C11 C12 C13 118.1(3) . . ?
C11 C12 C17 121.1(3) . . ?
C13 C12 C17 120.8(3) . . ?
C14 C13 C12 120.9(4) . . ?
C14 C13 H13 119.6 . . ?
C12 C13 H13 119.6 . . ?
C15 C14 C13 119.9(3) . . ?
C15 C14 H14 120.0 . . ?
C13 C14 H14 120.0 . . ?
C14 C15 C16 121.8(4) . . ?
C14 C15 H15 119.1 . . ?
C16 C15 H15 119.1 . . ?
C15 C16 C11 117.3(3) . . ?
C15 C16 C18 121.4(3) . . ?
C11 C16 C18 121.3(3) . . ?
C12 C17 H17A 109.5 . . ?
C12 C17 H17B 109.5 . . ?
H17A C17 H17B 109.5 . . ?
C12 C17 H17C 109.5 . . ?
H17A C17 H17C 109.5 . . ?
H17B C17 H17C 109.5 . . ?
C16 C18 H18A 109.5 . . ?
C16 C18 H18B 109.5 . . ?
H18A C18 H18B 109.5 . . ?
C16 C18 H18C 109.5 . . ?
H18A C18 H18C 109.5 . . ?
H18B C18 H18C 109.5 . . ?
C20 C19 C24 119.1(3) . . ?
C20 C19 P4 119.5(2) . . ?
C24 C19 P4 121.5(2) . . ?
C21 C20 C19 120.8(3) . . ?
C21 C20 H20 119.6 . . ?
C19 C20 H20 119.6 . . ?
C20 C21 C22 120.2(3) . . ?
C20 C21 H21 119.9 . . ?
C22 C21 H21 119.9 . . ?
C23 C22 C21 119.4(3) . . ?
C23 C22 H22 120.3 . . ?
C21 C22 H22 120.3 . . ?
C22 C23 C24 120.8(3) . . ?
C22 C23 H23 119.6 . . ?
C24 C23 H23 119.6 . . ?
C23 C24 C19 119.7(3) . . ?
C23 C24 H24 120.1 . . ?
C19 C24 H24 120.1 . . ?
C30 C25 C26 119.9(3) . . ?
C30 C25 P4 120.5(2) . . ?
C26 C25 P4 119.6(2) . . ?
C27 C26 C25 120.1(3) . . ?
C27 C26 H26 120.0 . . ?
C25 C26 H26 120.0 . . ?
C28 C27 C26 119.5(3) . . ?
C28 C27 H27 120.3 . . ?
C26 C27 H27 120.3 . . ?
C29 C28 C27 120.6(3) . . ?
C29 C28 H28 119.7 . . ?
C27 C28 H28 119.7 . . ?
C28 C29 C30 120.2(3) . . ?
C28 C29 H29 119.9 . . ?
C30 C29 H29 119.9 . . ?
C25 C30 C29 119.7(3) . . ?
C25 C30 H30 120.1 . . ?
C29 C30 H30 120.1 . . ?
C32 C31 C36 119.2(3) . . ?
C32 C31 P4 124.4(2) . . ?
C36 C31 P4 116.5(2) . . ?
C31 C32 C33 120.0(3) . . ?
C31 C32 H32 120.0 . . ?
C33 C32 H32 120.0 . . ?
C34 C33 C32 120.5(3) . . ?
C34 C33 H33 119.8 . . ?
C32 C33 H33 119.8 . . ?
C33 C34 C35 119.8(3) . . ?
C33 C34 H34 120.1 . . ?
C35 C34 H34 120.1 . . ?
C34 C35 C36 120.0(3) . . ?
C34 C35 H35 120.0 . . ?
C36 C35 H35 120.0 . . ?
C31 C36 C35 120.5(3) . . ?
C31 C36 H36 119.7 . . ?
C35 C36 H36 119.7 . . ?
C1S O1S C1S 110.4(5) . 2_655 ?
O1S C1S C2S 108.5(4) . . ?
O1S C1S H1S1 110.0 . . ?
C2S C1S H1S1 110.0 . . ?
O1S C1S H1S2 110.0 . . ?
C2S C1S H1S2 110.0 . . ?
H1S1 C1S H1S2 108.4 . . ?
C1S C2S C2S 104.0(3) . 2_655 ?
C1S C2S H2S1 110.9 . . ?
C2S C2S H2S1 110.9 2_655 . ?
C1S C2S H2S2 110.9 . . ?
C2S C2S H2S2 110.9 2_655 . ?
H2S1 C2S H2S2 109.0 . . ?

loop_
_geom_torsion_atom_site_label_1
_geom_torsion_atom_site_label_2
_geom_torsion_atom_site_label_3
_geom_torsion_atom_site_label_4
_geom_torsion
_geom_torsion_site_symmetry_1
_geom_torsion_site_symmetry_2
_geom_torsion_site_symmetry_3
_geom_torsion_site_symmetry_4
_geom_torsion_publ_flag
C2 N2 C1 S1 0.9(4) . . . . ?
C3 N2 C1 S1 -178.3(2) . . . . ?
C2 N2 C1 S3 -179.2(2) . . . . ?
C3 N2 C1 S3 1.6(4) . . . . ?
Au1 S3 C1 N2 -168.6(2) . . . . ?
Au1 S3 C1 S1 11.3(2) . . . . ?
C11 N3 C2 N2 179.4(3) . . . . ?
C1 N2 C2 N3 -179.5(3) . . . . ?
C3 N2 C2 N3 -0.2(4) . . . . ?
C1 N2 C3 C4 -91.2(3) . . . . ?
C2 N2 C3 C4 89.5(3) . . . . ?
C1 N2 C3 C8 87.7(3) . . . . ?
C2 N2 C3 C8 -91.5(3) . . . . ?
C8 C3 C4 C5 -0.2(4) . . . . ?
N2 C3 C4 C5 178.6(3) . . . . ?
C8 C3 C4 C10 -179.9(3) . . . . ?
N2 C3 C4 C10 -1.0(4) . . . . ?
C3 C4 C5 C6 -0.1(5) . . . . ?
C10 C4 C5 C6 179.5(3) . . . . ?
C4 C5 C6 C7 0.1(5) . . . . ?
C5 C6 C7 C8 0.3(5) . . . . ?
C6 C7 C8 C3 -0.6(5) . . . . ?
C6 C7 C8 C9 -178.8(3) . . . . ?
C4 C3 C8 C7 0.6(4) . . . . ?
N2 C3 C8 C7 -178.3(3) . . . . ?
C4 C3 C8 C9 178.7(3) . . . . ?
N2 C3 C8 C9 -0.1(4) . . . . ?
C2 N3 C11 C12 -100.9(4) . . . . ?
C2 N3 C11 C16 86.4(4) . . . . ?
C16 C11 C12 C13 -3.8(5) . . . . ?
N3 C11 C12 C13 -176.3(3) . . . . ?
C16 C11 C12 C17 175.6(3) . . . . ?
N3 C11 C12 C17 3.1(5) . . . . ?
C11 C12 C13 C14 1.9(5) . . . . ?
C17 C12 C13 C14 -177.5(3) . . . . ?
C12 C13 C14 C15 0.5(5) . . . . ?
C13 C14 C15 C16 -1.1(5) . . . . ?
C14 C15 C16 C11 -0.6(5) . . . . ?
C14 C15 C16 C18 178.0(3) . . . . ?
C12 C11 C16 C15 3.1(5) . . . . ?
N3 C11 C16 C15 175.6(3) . . . . ?
C12 C11 C16 C18 -175.6(3) . . . . ?
N3 C11 C16 C18 -3.1(5) . . . . ?
C25 P4 C19 C20 -171.7(3) . . . . ?
C31 P4 C19 C20 -61.5(3) . . . . ?
Au1 P4 C19 C20 62.6(3) . . . . ?
C25 P4 C19 C24 9.8(3) . . . . ?
C31 P4 C19 C24 120.0(2) . . . . ?
Au1 P4 C19 C24 -115.8(2) . . . . ?
C24 C19 C20 C21 -2.4(5) . . . . ?
P4 C19 C20 C21 179.1(3) . . . . ?
C19 C20 C21 C22 1.0(5) . . . . ?
C20 C21 C22 C23 1.3(5) . . . . ?
C21 C22 C23 C24 -2.2(5) . . . . ?
C22 C23 C24 C19 0.8(5) . . . . ?
C20 C19 C24 C23 1.5(4) . . . . ?
P4 C19 C24 C23 180.0(2) . . . . ?
C19 P4 C25 C30 -116.1(3) . . . . ?
C31 P4 C25 C30 131.0(3) . . . . ?
Au1 P4 C25 C30 9.4(3) . . . . ?
C19 P4 C25 C26 63.8(3) . . . . ?
C31 P4 C25 C26 -49.1(3) . . . . ?
Au1 P4 C25 C26 -170.7(2) . . . . ?
C30 C25 C26 C27 0.8(5) . . . . ?
P4 C25 C26 C27 -179.1(2) . . . . ?
C25 C26 C27 C28 -0.6(5) . . . . ?
C26 C27 C28 C29 0.4(5) . . . . ?
C27 C28 C29 C30 -0.3(5) . . . . ?
C26 C25 C30 C29 -0.7(5) . . . . ?
P4 C25 C30 C29 179.2(3) . . . . ?
C28 C29 C30 C25 0.4(5) . . . . ?
C25 P4 C31 C32 106.8(3) . . . . ?
C19 P4 C31 C32 -5.6(3) . . . . ?
Au1 P4 C31 C32 -130.5(2) . . . . ?
C25 P4 C31 C36 -72.3(3) . . . . ?
C19 P4 C31 C36 175.3(3) . . . . ?
Au1 P4 C31 C36 50.4(3) . . . . ?
C36 C31 C32 C33 1.6(5) . . . . ?
P4 C31 C32 C33 -177.5(2) . . . . ?
C31 C32 C33 C34 0.2(5) . . . . ?
C32 C33 C34 C35 -1.3(5) . . . . ?
C33 C34 C35 C36 0.6(6) . . . . ?
C32 C31 C36 C35 -2.2(5) . . . . ?
P4 C31 C36 C35 176.9(3) . . . . ?
C34 C35 C36 C31 1.1(6) . . . . ?
C1S O1S C1S C2S 7.1(3) 2_655 . . . ?
O1S C1S C2S C2S -17.9(7) . . . 2_655 ?

_refine_diff_density_max         0.925
_refine_diff_density_min         -0.544
_refine_diff_density_rms         0.091

_shelxl_version_number           2013-4


_diffrn_standards_decay_%        0.0
_symmetry_cell_setting           monoclinic
_symmetry_space_group_name_h-m   'C 2/c'
_symmetry_int_tables_number      15


data_AuCS2

_audit_creation_method           SHELXL-2013
_chemical_name_systematic        ?
_chemical_name_common            ?
_chemical_formula_moiety         'C72 H76 Au4 N8 S8'
_chemical_formula_sum            'C72 H76 Au4 N8 S8'
_chemical_melting_point          ?

_exptl_crystal_description       Needle
_exptl_crystal_colour            Orange

_diffrn_ambient_temperature      100(2)
_chemical_formula_weight         2097.75

loop_
_atom_type_symbol
_atom_type_description
_atom_type_scat_dispersion_real
_atom_type_scat_dispersion_imag
_atom_type_scat_source
C C 0.0181 0.0091 'International Tables Vol C Tables 4.2.6.8 and 6.1.1.4'
H H 0.0000 0.0000 'International Tables Vol C Tables 4.2.6.8 and 6.1.1.4'
N N 0.0311 0.0180 'International Tables Vol C Tables 4.2.6.8 and 6.1.1.4'
S S 0.3331 0.5567 'International Tables Vol C Tables 4.2.6.8 and 6.1.1.4'
Au Au -4.4197 7.2980 'International Tables Vol C Tables 4.2.6.8 and 6.1.1.4'

_space_group_crystal_system      triclinic
_space_group_IT_number           2
_space_group_name_H-M_alt        'P -1'
_space_group_name_Hall           '-P 1'

_shelx_space_group_comment
;
The symmetry employed for this shelxl refinement is uniquely defined
by the following loop, which should always be used as a source of
symmetry information in preference to the above space-group names.
They are only intended as comments.
;

loop_
_space_group_symop_operation_xyz
'x, y, z'
'-x, -y, -z'

_cell_length_a                   8.3937(2)
_cell_length_b                   15.4728(4)
_cell_length_c                   29.2585(8)
_cell_angle_alpha                99.1330(10)
_cell_angle_beta                 96.0620(10)
_cell_angle_gamma                102.1610(10)
_cell_volume                     3629.30(16)
_cell_formula_units_Z            2
_cell_measurement_temperature    100(2)
_cell_measurement_reflns_used    3.0
_cell_measurement_theta_min      72.0
_cell_measurement_theta_max      ?
_exptl_crystal_density_meas      ?
_exptl_crystal_density_method    ?
_exptl_crystal_density_diffrn    1.920
_exptl_crystal_F_000             2016
_exptl_transmission_factor_min   ?
_exptl_transmission_factor_max   ?
_exptl_crystal_size_max          0.350
_exptl_crystal_size_mid          0.020
_exptl_crystal_size_min          0.010
_exptl_absorpt_coefficient_mu    17.373
_shelx_estimated_absorpt_T_min   0.064
_shelx_estimated_absorpt_T_max   0.845
_exptl_absorpt_correction_type   multi-scan
_exptl_absorpt_correction_T_min  0.39
_exptl_absorpt_correction_T_max  0.85
_exptl_absorpt_process_details
;
 Data were corrected for decay and absorption using the program SADABS
 (Sheldrick, G. M. (2003). SADABS. Version 2.10. University of
 G\"ottingen, Germany).
;

_exptl_special_details
;
 This is a polymeric structure, so the atomic coordinates cause 
 CheckCif to report that they do not form a "properly connected
 set", though they do in fact form such a set.  
;
_diffrn_radiation_probe          ?
_diffrn_radiation_type           CuK\a
_diffrn_radiation_wavelength     1.54178
_diffrn_source                   'Incoatec Cu Microfocus tube'

_diffrn_measurement_device_type  'Bruker APEXII CCD area detector'
_diffrn_measurement_method       'omega and phi scans'
_diffrn_detector_area_resol_mean ?
_diffrn_reflns_number            67268
_diffrn_reflns_av_unetI/netI     0.0182
_diffrn_reflns_av_R_equivalents  0.0245
_diffrn_reflns_limit_h_min       -8
_diffrn_reflns_limit_h_max       10
_diffrn_reflns_limit_k_min       -19
_diffrn_reflns_limit_k_max       18
_diffrn_reflns_limit_l_min       -35
_diffrn_reflns_limit_l_max       34
_diffrn_reflns_theta_min         2.973
_diffrn_reflns_theta_max         72.227
_diffrn_reflns_theta_full        67.679
_diffrn_measured_fraction_theta_max 0.955
_diffrn_measured_fraction_theta_full 0.975
_diffrn_reflns_Laue_measured_fraction_max 0.955
_diffrn_reflns_Laue_measured_fraction_full 0.975
_diffrn_reflns_point_group_measured_fraction_max 0.955
_diffrn_reflns_point_group_measured_fraction_full 0.975
_reflns_number_total             13696
_reflns_number_gt                12936
_reflns_threshold_expression     'I > 2\s(I)'
_reflns_Friedel_coverage         0.000
_reflns_Friedel_fraction_max     .
_reflns_Friedel_fraction_full    .

_reflns_special_details
;
 Reflections were merged by SHELXL according to the crystal
 class for the calculation of statistics and refinement.

 _reflns_Friedel_fraction is defined as the number of unique
 Friedel pairs measured divided by the number that would be
 possible theoretically, ignoring centric projections and
 systematic absences.
;

_computing_data_collection       'APEX2 (Bruker AXS, 2008)'
_computing_cell_refinement       'APEX2 (Bruker AXS, 2008)'
_computing_data_reduction        'APEX2 (Bruker AXS, 2008)'
_computing_structure_solution    'SHELXS-2013 (Sheldrick, 2013)'
_computing_structure_refinement  'SHELXL-2013 (Sheldrick, 2013)'
_computing_molecular_graphics    'X-SEED, Barbour, 2001'
_computing_publication_material  'CIFTAB (Sheldrick, 2013)'

_refine_special_details
;
 ?
;
_refine_ls_structure_factor_coef Fsqd
_refine_ls_matrix_type           full
_refine_ls_weighting_scheme      calc
_refine_ls_weighting_details
'w=1/[\s^2^(Fo^2^)+(0.0187P)^2^+5.0208P] where P=(Fo^2^+2Fc^2^)/3'
_atom_sites_solution_primary     ?
_atom_sites_solution_secondary   ?
_atom_sites_solution_hydrogens   geom
_refine_ls_hydrogen_treatment    constr
_refine_ls_extinction_method     none
_refine_ls_extinction_coef       .
_refine_ls_number_reflns         13696
_refine_ls_number_parameters     845
_refine_ls_number_restraints     0
_refine_ls_R_factor_all          0.0201
_refine_ls_R_factor_gt           0.0183
_refine_ls_wR_factor_ref         0.0435
_refine_ls_wR_factor_gt          0.0427
_refine_ls_goodness_of_fit_ref   1.075
_refine_ls_restrained_S_all      1.075
_refine_ls_shift/su_max          0.005
_refine_ls_shift/su_mean         0.000

loop_
_atom_site_label
_atom_site_type_symbol
_atom_site_fract_x
_atom_site_fract_y
_atom_site_fract_z
_atom_site_U_iso_or_equiv
_atom_site_adp_type
_atom_site_occupancy
_atom_site_site_symmetry_order
_atom_site_calc_flag
_atom_site_refinement_flags_posn
_atom_site_refinement_flags_adp
_atom_site_refinement_flags_occupancy
_atom_site_disorder_assembly
_atom_site_disorder_group
Au1 Au -0.06448(2) 0.54637(2) 0.72066(2) 0.01630(3) Uani 1 1 d . . . . .
Au2 Au 0.08316(2) 0.43001(2) 0.76289(2) 0.01729(3) Uani 1 1 d . . . . .
Au3 Au 0.43807(2) 0.52609(2) 0.79397(2) 0.01633(3) Uani 1 1 d . . . . .
Au4 Au 0.57706(2) 0.47081(2) 0.71644(2) 0.01549(3) Uani 1 1 d . . . . .
S1 S -0.11621(9) 0.44226(5) 0.65166(2) 0.01863(14) Uani 1 1 d . . . . .
S2 S 0.14545(9) 0.35497(5) 0.69608(2) 0.02017(15) Uani 1 1 d . . . . .
S3 S -0.00586(9) 0.65772(5) 0.78671(2) 0.01937(15) Uani 1 1 d . . . . .
S4 S 0.01725(11) 0.49462(5) 0.83215(2) 0.02520(17) Uani 1 1 d . . . . .
S5 S 0.42346(10) 0.39279(5) 0.82080(3) 0.02015(15) Uani 1 1 d . . . . .
S6 S 0.63031(9) 0.34702(5) 0.74296(2) 0.01873(14) Uani 1 1 d . . . . .
S7 S 0.45971(10) 0.66739(5) 0.77723(3) 0.02269(16) Uani 1 1 d . . . . .
S8 S 0.52842(10) 0.58639(5) 0.68046(2) 0.02182(15) Uani 1 1 d . . . . .
N1 N 0.0446(3) 0.33421(16) 0.60685(8) 0.0169(5) Uani 1 1 d . . . . .
N2 N -0.0066(3) 0.31544(17) 0.52632(8) 0.0187(5) Uani 1 1 d . . . . .
N3 N 0.0549(3) 0.66138(16) 0.87668(8) 0.0171(5) Uani 1 1 d . . . . .
N4 N 0.1174(3) 0.67877(16) 0.95724(8) 0.0186(5) Uani 1 1 d . . . . .
N5 N 0.5593(3) 0.25298(15) 0.80719(8) 0.0155(5) Uani 1 1 d . . . . .
N6 N 0.5345(3) 0.16432(16) 0.86429(8) 0.0166(5) Uani 1 1 d . . . . .
N7 N 0.4980(3) 0.75282(15) 0.70815(8) 0.0164(5) Uani 1 1 d . . . . .
N8 N 0.5245(3) 0.84533(16) 0.65319(8) 0.0183(5) Uani 1 1 d . . . . .
C1 C 0.1276(4) 0.2601(2) 0.60342(10) 0.0210(6) Uani 1 1 d . . . . .
C2 C 0.0358(4) 0.1749(2) 0.60480(11) 0.0267(7) Uani 1 1 d . . . . .
C3 C 0.1214(5) 0.1060(2) 0.60419(12) 0.0364(9) Uani 1 1 d . . . . .
H3 H 0.0632 0.0465 0.6048 0.044 Uiso 1 1 calc R U . . .
C4 C 0.2871(5) 0.1232(3) 0.60274(12) 0.0401(10) Uani 1 1 d . . . . .
H4 H 0.3431 0.0759 0.6031 0.048 Uiso 1 1 calc R U . . .
C5 C 0.3745(5) 0.2087(3) 0.60081(11) 0.0334(8) Uani 1 1 d . . . . .
H5 H 0.4895 0.2195 0.5996 0.040 Uiso 1 1 calc R U . . .
C6 C 0.2949(4) 0.2792(2) 0.60068(10) 0.0229(7) Uani 1 1 d . . . . .
C7 C -0.1454(5) 0.1577(2) 0.60726(13) 0.0354(8) Uani 1 1 d . . . . .
H7A H -0.1636 0.1886 0.6375 0.053 Uiso 1 1 calc R U . . .
H7B H -0.1908 0.0929 0.6038 0.053 Uiso 1 1 calc R U . . .
H7C H -0.2001 0.1806 0.5820 0.053 Uiso 1 1 calc R U . . .
C8 C 0.3873(4) 0.3725(2) 0.59810(11) 0.0268(7) Uani 1 1 d . . . . .
H8A H 0.5058 0.3776 0.6059 0.040 Uiso 1 1 calc R U . . .
H8B H 0.3526 0.4167 0.6204 0.040 Uiso 1 1 calc R U . . .
H8C H 0.3637 0.3839 0.5664 0.040 Uiso 1 1 calc R U . . .
C9 C -0.0609(4) 0.3477(2) 0.48585(10) 0.0188(6) Uani 1 1 d . . . . .
C10 C -0.2219(4) 0.3595(2) 0.47679(10) 0.0221(6) Uani 1 1 d . . . . .
C11 C -0.2694(4) 0.3850(2) 0.43486(11) 0.0249(7) Uani 1 1 d . . . . .
H11 H -0.3773 0.3942 0.4286 0.030 Uiso 1 1 calc R U . . .
C12 C -0.1635(4) 0.3972(2) 0.40215(11) 0.0244(7) Uani 1 1 d . . . . .
H12 H -0.1988 0.4139 0.3736 0.029 Uiso 1 1 calc R U . . .
C13 C -0.0049(4) 0.3849(2) 0.41147(10) 0.0216(6) Uani 1 1 d . . . . .
H13 H 0.0681 0.3931 0.3890 0.026 Uiso 1 1 calc R U . . .
C14 C 0.0485(4) 0.36075(19) 0.45309(10) 0.0195(6) Uani 1 1 d . . . . .
C15 C -0.3443(4) 0.3436(3) 0.51065(11) 0.0324(8) Uani 1 1 d . . . . .
H15A H -0.3234 0.3965 0.5357 0.049 Uiso 1 1 calc R U . . .
H15B H -0.3325 0.2908 0.5241 0.049 Uiso 1 1 calc R U . . .
H15C H -0.4563 0.3333 0.4941 0.049 Uiso 1 1 calc R U . . .
C16 C 0.2229(4) 0.3520(2) 0.46406(11) 0.0249(7) Uani 1 1 d . . . . .
H16A H 0.2739 0.3487 0.4354 0.037 Uiso 1 1 calc R U . . .
H16B H 0.2231 0.2972 0.4768 0.037 Uiso 1 1 calc R U . . .
H16C H 0.2855 0.4045 0.4871 0.037 Uiso 1 1 calc R U . . .
C17 C -0.0065(4) 0.3625(2) 0.56558(10) 0.0180(6) Uani 1 1 d . . . . .
H17 H -0.0410 0.4175 0.5673 0.022 Uiso 1 1 calc R U . . .
C18 C 0.0275(4) 0.37722(19) 0.65037(10) 0.0176(6) Uani 1 1 d . . . . .
C19 C 0.0338(4) 0.75294(19) 0.88284(9) 0.0175(6) Uani 1 1 d . . . . .
C20 C -0.1226(4) 0.7663(2) 0.88859(10) 0.0211(6) Uani 1 1 d . . . . .
C21 C -0.1403(4) 0.8548(2) 0.89660(11) 0.0282(7) Uani 1 1 d . . . . .
H21 H -0.2456 0.8663 0.9000 0.034 Uiso 1 1 calc R U . . .
C22 C -0.0061(5) 0.9263(2) 0.89963(12) 0.0303(8) Uani 1 1 d . . . . .
H22 H -0.0201 0.9862 0.9052 0.036 Uiso 1 1 calc R U . . .
C23 C 0.1477(4) 0.9106(2) 0.89464(11) 0.0250(7) Uani 1 1 d . . . . .
H23 H 0.2391 0.9601 0.8972 0.030 Uiso 1 1 calc R U . . .
C24 C 0.1710(4) 0.8231(2) 0.88585(10) 0.0192(6) Uani 1 1 d . . . . .
C25 C -0.2645(4) 0.6878(2) 0.88753(12) 0.0290(7) Uani 1 1 d . . . . .
H25A H -0.2421 0.6577 0.9138 0.044 Uiso 1 1 calc R U . . .
H25B H -0.2782 0.6451 0.8580 0.044 Uiso 1 1 calc R U . . .
H25C H -0.3655 0.7093 0.8901 0.044 Uiso 1 1 calc R U . . .
C26 C 0.3375(4) 0.8060(2) 0.88031(11) 0.0239(7) Uani 1 1 d . . . . .
H26A H 0.4191 0.8635 0.8857 0.036 Uiso 1 1 calc R U . . .
H26B H 0.3353 0.7735 0.8485 0.036 Uiso 1 1 calc R U . . .
H26C H 0.3673 0.7698 0.9030 0.036 Uiso 1 1 calc R U . . .
C27 C 0.1015(4) 0.63011(19) 0.91766(10) 0.0183(6) Uani 1 1 d . . . . .
H27 H 0.1210 0.5714 0.9153 0.022 Uiso 1 1 calc R U . . .
C28 C 0.1660(4) 0.64019(19) 0.99639(10) 0.0206(6) Uani 1 1 d . . . . .
C29 C 0.0539(4) 0.6276(2) 1.02855(10) 0.0239(7) Uani 1 1 d . . . . .
C30 C 0.0980(5) 0.5927(2) 1.06723(11) 0.0314(8) Uani 1 1 d . . . . .
H30 H 0.0235 0.5842 1.0893 0.038 Uiso 1 1 calc R U . . .
C31 C 0.2470(5) 0.5698(2) 1.07471(12) 0.0365(9) Uani 1 1 d . . . . .
H31 H 0.2739 0.5446 1.1013 0.044 Uiso 1 1 calc R U . . .
C32 C 0.3571(5) 0.5837(2) 1.04332(12) 0.0319(8) Uani 1 1 d . . . . .
H32 H 0.4609 0.5691 1.0490 0.038 Uiso 1 1 calc R U . . .
C33 C 0.3196(4) 0.6188(2) 1.00333(11) 0.0237(7) Uani 1 1 d . . . . .
C34 C -0.1119(4) 0.6487(2) 1.01952(12) 0.0311(8) Uani 1 1 d . . . . .
H34A H -0.1825 0.6017 0.9949 0.047 Uiso 1 1 calc R U . . .
H34B H -0.0990 0.7070 1.0095 0.047 Uiso 1 1 calc R U . . .
H34C H -0.1625 0.6510 1.0482 0.047 Uiso 1 1 calc R U . . .
C35 C 0.4444(4) 0.6360(2) 0.97013(12) 0.0316(8) Uani 1 1 d . . . . .
H35A H 0.5527 0.6330 0.9851 0.047 Uiso 1 1 calc R U . . .
H35B H 0.4502 0.6957 0.9623 0.047 Uiso 1 1 calc R U . . .
H35C H 0.4110 0.5902 0.9415 0.047 Uiso 1 1 calc R U . . .
C36 C 0.0262(4) 0.60706(19) 0.83341(10) 0.0168(6) Uani 1 1 d . . . . .
C37 C 0.6125(4) 0.18485(18) 0.77632(10) 0.0169(6) Uani 1 1 d . . . . .
C38 C 0.4947(4) 0.12673(19) 0.74134(10) 0.0199(6) Uani 1 1 d . . . . .
C39 C 0.5493(4) 0.0650(2) 0.71044(11) 0.0261(7) Uani 1 1 d . . . . .
H39 H 0.4727 0.0243 0.6863 0.031 Uiso 1 1 calc R U . . .
C40 C 0.7126(5) 0.0622(2) 0.71447(12) 0.0309(8) Uani 1 1 d . . . . .
H40 H 0.7475 0.0198 0.6930 0.037 Uiso 1 1 calc R U . . .
C41 C 0.8269(4) 0.1204(2) 0.74939(12) 0.0271(7) Uani 1 1 d . . . . .
H41 H 0.9394 0.1178 0.7515 0.033 Uiso 1 1 calc R U . . .
C42 C 0.7781(4) 0.1828(2) 0.78142(10) 0.0199(6) Uani 1 1 d . . . . .
C43 C 0.3168(4) 0.1319(2) 0.73669(11) 0.0267(7) Uani 1 1 d . . . . .
H43A H 0.3051 0.1861 0.7245 0.040 Uiso 1 1 calc R U . . .
H43B H 0.2796 0.1345 0.7674 0.040 Uiso 1 1 calc R U . . .
H43C H 0.2498 0.0785 0.7151 0.040 Uiso 1 1 calc R U . . .
C44 C 0.9002(4) 0.2468(2) 0.81979(11) 0.0255(7) Uani 1 1 d . . . . .
H44A H 0.8785 0.3070 0.8224 0.038 Uiso 1 1 calc R U . . .
H44B H 1.0121 0.2489 0.8125 0.038 Uiso 1 1 calc R U . . .
H44C H 0.8895 0.2260 0.8495 0.038 Uiso 1 1 calc R U . . .
C45 C 0.5277(4) 0.23827(19) 0.85169(10) 0.0173(6) Uani 1 1 d . . . . .
H45 H 0.5007 0.2845 0.8728 0.021 Uiso 1 1 calc R U . . .
C46 C 0.4913(4) 0.15272(18) 0.90925(10) 0.0169(6) Uani 1 1 d . . . . .
C47 C 0.3321(4) 0.15387(19) 0.91956(10) 0.0190(6) Uani 1 1 d . . . . .
C48 C 0.2926(4) 0.1351(2) 0.96253(11) 0.0230(6) Uani 1 1 d . . . . .
H48 H 0.1856 0.1363 0.9701 0.028 Uiso 1 1 calc R U . . .
C49 C 0.4075(4) 0.1146(2) 0.99470(11) 0.0247(7) Uani 1 1 d . . . . .
H49 H 0.3789 0.1017 1.0238 0.030 Uiso 1 1 calc R U . . .
C50 C 0.5633(4) 0.1133(2) 0.98382(11) 0.0238(7) Uani 1 1 d . . . . .
H50 H 0.6415 0.0999 1.0059 0.029 Uiso 1 1 calc R U . . .
C51 C 0.6083(4) 0.13131(19) 0.94129(10) 0.0196(6) Uani 1 1 d . . . . .
C52 C 0.2015(4) 0.1710(2) 0.88468(11) 0.0256(7) Uani 1 1 d . . . . .
H52A H 0.2263 0.2348 0.8824 0.038 Uiso 1 1 calc R U . . .
H52B H 0.0936 0.1548 0.8950 0.038 Uiso 1 1 calc R U . . .
H52C H 0.1998 0.1344 0.8540 0.038 Uiso 1 1 calc R U . . .
C53 C 0.7772(4) 0.1303(2) 0.92988(11) 0.0232(7) Uani 1 1 d . . . . .
H53A H 0.7692 0.0944 0.8986 0.035 Uiso 1 1 calc R U . . .
H53B H 0.8349 0.1039 0.9530 0.035 Uiso 1 1 calc R U . . .
H53C H 0.8383 0.1920 0.9306 0.035 Uiso 1 1 calc R U . . .
C54 C 0.5398(4) 0.33017(19) 0.79132(10) 0.0171(6) Uani 1 1 d . . . . .
C55 C 0.4617(4) 0.82535(18) 0.74052(10) 0.0168(6) Uani 1 1 d . . . . .
C56 C 0.2986(4) 0.83316(19) 0.73848(10) 0.0186(6) Uani 1 1 d . . . . .
C57 C 0.2650(4) 0.9014(2) 0.77029(11) 0.0234(7) Uani 1 1 d . . . . .
H57 H 0.1547 0.9074 0.7705 0.028 Uiso 1 1 calc R U . . .
C58 C 0.3910(4) 0.9607(2) 0.80176(11) 0.0260(7) Uani 1 1 d . . . . .
H58 H 0.3667 1.0077 0.8230 0.031 Uiso 1 1 calc R U . . .
C59 C 0.5513(4) 0.9521(2) 0.80232(10) 0.0246(7) Uani 1 1 d . . . . .
H59 H 0.6362 0.9934 0.8240 0.029 Uiso 1 1 calc R U . . .
C60 C 0.5913(4) 0.88369(19) 0.77168(10) 0.0200(6) Uani 1 1 d . . . . .
C61 C 0.1652(4) 0.7698(2) 0.70327(10) 0.0230(7) Uani 1 1 d . . . . .
H61A H 0.0581 0.7813 0.7092 0.034 Uiso 1 1 calc R U . . .
H61B H 0.1667 0.7076 0.7059 0.034 Uiso 1 1 calc R U . . .
H61C H 0.1837 0.7791 0.6717 0.034 Uiso 1 1 calc R U . . .
C62 C 0.7655(4) 0.8733(2) 0.77213(11) 0.0264(7) Uani 1 1 d . . . . .
H62A H 0.7743 0.8165 0.7819 0.040 Uiso 1 1 calc R U . . .
H62B H 0.8397 0.9236 0.7941 0.040 Uiso 1 1 calc R U . . .
H62C H 0.7959 0.8730 0.7407 0.040 Uiso 1 1 calc R U . . .
C63 C 0.5318(4) 0.77009(19) 0.66395(10) 0.0179(6) Uani 1 1 d . . . . .
H63 H 0.5600 0.7253 0.6422 0.022 Uiso 1 1 calc R U . . .
C64 C 0.5663(4) 0.86193(19) 0.60903(10) 0.0190(6) Uani 1 1 d . . . . .
C65 C 0.4433(4) 0.8795(2) 0.57743(11) 0.0220(6) Uani 1 1 d . . . . .
C66 C 0.4841(4) 0.9017(2) 0.53536(11) 0.0278(7) Uani 1 1 d . . . . .
H66 H 0.4024 0.9137 0.5138 0.033 Uiso 1 1 calc R U . . .
C67 C 0.6414(5) 0.9066(2) 0.52417(11) 0.0312(8) Uani 1 1 d . . . . .
H67 H 0.6672 0.9217 0.4951 0.037 Uiso 1 1 calc R U . . .
C68 C 0.7608(4) 0.8895(2) 0.55546(11) 0.0274(7) Uani 1 1 d . . . . .
H68 H 0.8687 0.8930 0.5477 0.033 Uiso 1 1 calc R U . . .
C69 C 0.7261(4) 0.8673(2) 0.59834(11) 0.0219(6) Uani 1 1 d . . . . .
C70 C 0.2713(4) 0.8722(2) 0.58938(11) 0.0271(7) Uani 1 1 d . . . . .
H70A H 0.2057 0.8940 0.5659 0.041 Uiso 1 1 calc R U . . .
H70B H 0.2758 0.9087 0.6203 0.041 Uiso 1 1 calc R U . . .
H70C H 0.2206 0.8092 0.5897 0.041 Uiso 1 1 calc R U . . .
C71 C 0.8626(4) 0.8521(2) 0.63213(12) 0.0282(7) Uani 1 1 d . . . . .
H71A H 0.8459 0.7877 0.6327 0.042 Uiso 1 1 calc R U . . .
H71B H 0.8610 0.8850 0.6635 0.042 Uiso 1 1 calc R U . . .
H71C H 0.9691 0.8738 0.6220 0.042 Uiso 1 1 calc R U . . .
C72 C 0.4964(4) 0.67106(19) 0.72132(10) 0.0170(6) Uani 1 1 d . . . . .

loop_
_atom_site_aniso_label
_atom_site_aniso_U_11
_atom_site_aniso_U_22
_atom_site_aniso_U_33
_atom_site_aniso_U_23
_atom_site_aniso_U_13
_atom_site_aniso_U_12
Au1 0.01779(7) 0.01849(6) 0.01271(6) 0.00297(4) 0.00180(4) 0.00454(4)
Au2 0.02192(7) 0.01739(6) 0.01239(6) 0.00303(4) 0.00117(4) 0.00465(5)
Au3 0.02019(7) 0.01445(6) 0.01642(6) 0.00508(4) 0.00449(4) 0.00604(4)
Au4 0.01801(7) 0.01487(6) 0.01578(6) 0.00518(4) 0.00345(4) 0.00640(4)
S1 0.0175(4) 0.0247(4) 0.0136(3) 0.0012(3) 0.0007(3) 0.0074(3)
S2 0.0216(4) 0.0261(4) 0.0139(3) 0.0025(3) 0.0009(3) 0.0097(3)
S3 0.0261(4) 0.0184(3) 0.0135(3) 0.0031(3) 0.0012(3) 0.0057(3)
S4 0.0446(5) 0.0172(3) 0.0142(3) 0.0035(3) 0.0086(3) 0.0055(3)
S5 0.0238(4) 0.0192(3) 0.0231(4) 0.0106(3) 0.0082(3) 0.0100(3)
S6 0.0215(4) 0.0172(3) 0.0219(3) 0.0092(3) 0.0068(3) 0.0084(3)
S7 0.0368(5) 0.0158(3) 0.0195(3) 0.0062(3) 0.0110(3) 0.0091(3)
S8 0.0356(5) 0.0177(3) 0.0162(3) 0.0051(3) 0.0040(3) 0.0135(3)
N1 0.0170(14) 0.0198(12) 0.0140(11) 0.0028(9) 0.0013(9) 0.0049(10)
N2 0.0163(14) 0.0240(13) 0.0154(12) 0.0026(10) 0.0004(9) 0.0053(10)
N3 0.0175(14) 0.0180(12) 0.0156(12) 0.0036(9) 0.0022(9) 0.0036(10)
N4 0.0172(14) 0.0217(13) 0.0167(12) 0.0039(10) 0.0034(9) 0.0036(10)
N5 0.0162(13) 0.0139(11) 0.0174(12) 0.0057(9) 0.0012(9) 0.0041(9)
N6 0.0166(14) 0.0160(12) 0.0175(12) 0.0054(9) 0.0011(9) 0.0035(9)
N7 0.0192(14) 0.0146(12) 0.0167(12) 0.0030(9) 0.0036(9) 0.0063(9)
N8 0.0195(14) 0.0184(12) 0.0179(12) 0.0054(9) 0.0022(10) 0.0055(10)
C1 0.0267(18) 0.0242(16) 0.0131(13) 0.0029(11) 0.0017(11) 0.0092(13)
C2 0.037(2) 0.0236(16) 0.0189(15) 0.0026(12) 0.0042(13) 0.0077(14)
C3 0.060(3) 0.0265(18) 0.0263(18) 0.0071(14) 0.0069(16) 0.0149(17)
C4 0.065(3) 0.039(2) 0.0271(18) 0.0068(15) 0.0066(17) 0.035(2)
C5 0.037(2) 0.049(2) 0.0208(16) 0.0039(15) 0.0034(14) 0.0267(17)
C6 0.0255(19) 0.0319(17) 0.0122(14) -0.0009(12) 0.0019(11) 0.0124(13)
C7 0.039(2) 0.0267(18) 0.037(2) 0.0088(15) 0.0074(16) -0.0026(15)
C8 0.0185(18) 0.0406(19) 0.0199(15) 0.0022(13) 0.0035(12) 0.0059(14)
C9 0.0207(17) 0.0206(14) 0.0137(13) 0.0004(11) -0.0003(11) 0.0050(12)
C10 0.0178(17) 0.0296(17) 0.0176(14) 0.0006(12) 0.0016(11) 0.0056(12)
C11 0.0187(18) 0.0321(17) 0.0232(16) 0.0009(13) -0.0020(12) 0.0102(13)
C12 0.0275(19) 0.0271(16) 0.0189(15) 0.0051(12) -0.0009(12) 0.0084(13)
C13 0.0231(18) 0.0229(15) 0.0182(14) 0.0035(12) 0.0025(12) 0.0044(12)
C14 0.0186(17) 0.0198(15) 0.0185(14) 0.0001(11) 0.0008(11) 0.0047(11)
C15 0.0176(19) 0.057(2) 0.0242(17) 0.0082(15) 0.0040(13) 0.0107(15)
C16 0.0217(18) 0.0323(18) 0.0221(15) 0.0049(13) 0.0048(12) 0.0083(13)
C17 0.0144(16) 0.0200(14) 0.0192(14) 0.0038(11) 0.0015(11) 0.0035(11)
C18 0.0154(16) 0.0186(14) 0.0176(14) 0.0030(11) 0.0021(11) 0.0014(11)
C19 0.0219(17) 0.0192(14) 0.0120(13) 0.0038(11) 0.0017(11) 0.0060(11)
C20 0.0191(17) 0.0295(17) 0.0172(14) 0.0060(12) 0.0027(11) 0.0100(13)
C21 0.027(2) 0.040(2) 0.0240(16) 0.0069(14) 0.0068(13) 0.0194(15)
C22 0.044(2) 0.0235(17) 0.0295(17) 0.0055(13) 0.0089(15) 0.0179(15)
C23 0.033(2) 0.0192(15) 0.0227(15) 0.0037(12) 0.0071(13) 0.0045(13)
C24 0.0229(17) 0.0225(15) 0.0126(13) 0.0037(11) 0.0034(11) 0.0050(12)
C25 0.0175(18) 0.041(2) 0.0279(17) 0.0078(14) 0.0016(13) 0.0046(14)
C26 0.0205(18) 0.0248(16) 0.0264(16) 0.0063(12) 0.0061(12) 0.0026(12)
C27 0.0170(16) 0.0191(14) 0.0188(14) 0.0059(11) 0.0015(11) 0.0029(11)
C28 0.0276(18) 0.0166(14) 0.0144(14) 0.0026(11) -0.0008(12) 0.0002(12)
C29 0.0312(19) 0.0190(15) 0.0160(14) -0.0013(11) 0.0022(12) -0.0026(12)
C30 0.047(2) 0.0239(17) 0.0157(15) 0.0032(12) 0.0007(14) -0.0068(15)
C31 0.057(3) 0.0232(17) 0.0209(17) 0.0067(13) -0.0115(16) -0.0037(16)
C32 0.038(2) 0.0205(16) 0.0309(18) 0.0044(13) -0.0141(15) 0.0032(14)
C33 0.0273(19) 0.0174(15) 0.0228(15) 0.0034(12) -0.0036(12) 0.0014(12)
C34 0.031(2) 0.0330(19) 0.0253(17) 0.0009(14) 0.0078(14) 0.0005(14)
C35 0.023(2) 0.0350(19) 0.0379(19) 0.0081(15) 0.0010(14) 0.0103(14)
C36 0.0155(16) 0.0185(14) 0.0163(14) 0.0041(11) 0.0038(11) 0.0024(11)
C37 0.0223(17) 0.0138(13) 0.0174(14) 0.0061(11) 0.0041(11) 0.0072(11)
C38 0.0239(18) 0.0169(14) 0.0193(14) 0.0073(11) 0.0030(12) 0.0030(12)
C39 0.037(2) 0.0188(15) 0.0227(16) 0.0041(12) 0.0060(13) 0.0060(13)
C40 0.049(2) 0.0208(16) 0.0280(17) 0.0073(13) 0.0156(15) 0.0135(15)
C41 0.0263(19) 0.0288(17) 0.0339(18) 0.0146(14) 0.0120(14) 0.0129(14)
C42 0.0222(17) 0.0186(14) 0.0233(15) 0.0112(12) 0.0051(12) 0.0077(12)
C43 0.0246(19) 0.0253(16) 0.0271(17) 0.0042(13) -0.0020(13) 0.0022(13)
C44 0.0199(18) 0.0269(17) 0.0329(17) 0.0130(13) 0.0043(13) 0.0065(13)
C45 0.0147(16) 0.0182(14) 0.0184(14) 0.0022(11) 0.0007(11) 0.0041(11)
C46 0.0209(17) 0.0132(13) 0.0163(14) 0.0034(10) 0.0003(11) 0.0036(11)
C47 0.0197(17) 0.0162(14) 0.0213(15) 0.0043(11) 0.0024(12) 0.0045(11)
C48 0.0230(18) 0.0214(15) 0.0256(16) 0.0049(12) 0.0069(12) 0.0056(12)
C49 0.031(2) 0.0258(16) 0.0185(15) 0.0067(12) 0.0065(13) 0.0064(13)
C50 0.0284(19) 0.0244(16) 0.0197(15) 0.0076(12) -0.0002(12) 0.0080(13)
C51 0.0211(17) 0.0166(14) 0.0213(15) 0.0036(11) 0.0007(12) 0.0057(11)
C52 0.0186(18) 0.0322(18) 0.0294(17) 0.0109(13) 0.0051(13) 0.0087(13)
C53 0.0203(18) 0.0252(16) 0.0255(16) 0.0067(12) 0.0012(12) 0.0080(12)
C54 0.0146(16) 0.0153(14) 0.0197(14) 0.0046(11) -0.0025(11) 0.0013(11)
C55 0.0240(17) 0.0134(13) 0.0146(13) 0.0053(10) 0.0065(11) 0.0039(11)
C56 0.0221(17) 0.0179(14) 0.0188(14) 0.0091(11) 0.0058(11) 0.0052(12)
C57 0.0293(19) 0.0212(15) 0.0253(16) 0.0084(12) 0.0102(13) 0.0115(13)
C58 0.041(2) 0.0159(15) 0.0234(16) 0.0048(12) 0.0134(14) 0.0076(13)
C59 0.034(2) 0.0175(15) 0.0189(15) 0.0041(12) 0.0042(13) -0.0013(13)
C60 0.0266(18) 0.0169(14) 0.0169(14) 0.0075(11) 0.0048(12) 0.0022(12)
C61 0.0201(18) 0.0281(17) 0.0217(15) 0.0080(12) 0.0025(12) 0.0054(13)
C62 0.0238(19) 0.0275(17) 0.0250(16) 0.0051(13) -0.0010(13) 0.0015(13)
C63 0.0188(16) 0.0188(14) 0.0167(14) 0.0035(11) 0.0036(11) 0.0048(11)
C64 0.0247(17) 0.0148(14) 0.0189(14) 0.0045(11) 0.0054(12) 0.0052(11)
C65 0.0251(18) 0.0198(15) 0.0221(15) 0.0055(12) 0.0026(12) 0.0068(12)
C66 0.035(2) 0.0263(17) 0.0230(16) 0.0100(13) 0.0012(13) 0.0075(14)
C67 0.048(2) 0.0283(18) 0.0207(16) 0.0110(13) 0.0111(15) 0.0078(15)
C68 0.030(2) 0.0256(17) 0.0297(17) 0.0075(13) 0.0143(14) 0.0056(13)
C69 0.0248(18) 0.0187(15) 0.0233(15) 0.0047(12) 0.0059(12) 0.0057(12)
C70 0.0278(19) 0.0270(17) 0.0284(17) 0.0090(13) 0.0014(13) 0.0090(13)
C71 0.0235(19) 0.0337(18) 0.0310(18) 0.0103(14) 0.0081(14) 0.0093(14)
C72 0.0127(15) 0.0176(14) 0.0196(14) 0.0035(11) 0.0006(11) 0.0017(11)

_geom_special_details
;
 All esds (except the esd in the dihedral angle between two l.s. planes)
 are estimated using the full covariance matrix.  The cell esds are taken
 into account individually in the estimation of esds in distances, angles
 and torsion angles; correlations between esds in cell parameters are only
 used when they are defined by crystal symmetry.  An approximate (isotropic)
 treatment of cell esds is used for estimating esds involving l.s. planes.
;

loop_
_geom_bond_atom_site_label_1
_geom_bond_atom_site_label_2
_geom_bond_distance
_geom_bond_site_symmetry_2
_geom_bond_publ_flag
Au1 S3 2.3087(7) . ?
Au1 S1 2.3124(7) . ?
Au1 Au2 2.76154(17) . ?
Au1 Au4 2.97132(18) 1_455 ?
Au2 S2 2.2789(7) . ?
Au2 S4 2.2888(7) . ?
Au2 Au3 3.00745(19) . ?
Au3 S7 2.2900(7) . ?
Au3 S5 2.3051(7) . ?
Au3 Au4 2.75717(19) . ?
Au4 S6 2.2869(7) . ?
Au4 S8 2.2996(7) . ?
Au4 Au1 2.97129(18) 1_655 ?
S1 C18 1.725(3) . ?
S2 C18 1.702(3) . ?
S3 C36 1.704(3) . ?
S4 C36 1.720(3) . ?
S5 C54 1.717(3) . ?
S6 C54 1.705(3) . ?
S7 C72 1.703(3) . ?
S8 C72 1.714(3) . ?
N1 C18 1.377(4) . ?
N1 C17 1.405(4) . ?
N1 C1 1.457(4) . ?
N2 C17 1.259(4) . ?
N2 C9 1.425(4) . ?
N3 C36 1.371(4) . ?
N3 C27 1.410(4) . ?
N3 C19 1.450(4) . ?
N4 C27 1.255(4) . ?
N4 C28 1.434(4) . ?
N5 C54 1.382(4) . ?
N5 C45 1.399(4) . ?
N5 C37 1.452(4) . ?
N6 C45 1.267(4) . ?
N6 C46 1.429(4) . ?
N7 C72 1.378(4) . ?
N7 C63 1.407(4) . ?
N7 C55 1.455(4) . ?
N8 C63 1.265(4) . ?
N8 C64 1.422(4) . ?
C1 C6 1.387(5) . ?
C1 C2 1.390(4) . ?
C2 C3 1.404(5) . ?
C2 C7 1.499(5) . ?
C3 C4 1.367(6) . ?
C3 H3 0.9500 . ?
C4 C5 1.384(6) . ?
C4 H4 0.9500 . ?
C5 C6 1.394(5) . ?
C5 H5 0.9500 . ?
C6 C8 1.505(5) . ?
C7 H7A 0.9800 . ?
C7 H7B 0.9800 . ?
C7 H7C 0.9800 . ?
C8 H8A 0.9800 . ?
C8 H8B 0.9800 . ?
C8 H8C 0.9800 . ?
C9 C10 1.404(4) . ?
C9 C14 1.404(4) . ?
C10 C11 1.392(4) . ?
C10 C15 1.511(4) . ?
C11 C12 1.381(5) . ?
C11 H11 0.9500 . ?
C12 C13 1.390(5) . ?
C12 H12 0.9500 . ?
C13 C14 1.387(4) . ?
C13 H13 0.9500 . ?
C14 C16 1.504(4) . ?
C15 H15A 0.9800 . ?
C15 H15B 0.9800 . ?
C15 H15C 0.9800 . ?
C16 H16A 0.9800 . ?
C16 H16B 0.9800 . ?
C16 H16C 0.9800 . ?
C17 H17 0.9500 . ?
C19 C24 1.391(4) . ?
C19 C20 1.395(4) . ?
C20 C21 1.394(5) . ?
C20 C25 1.506(4) . ?
C21 C22 1.386(5) . ?
C21 H21 0.9500 . ?
C22 C23 1.381(5) . ?
C22 H22 0.9500 . ?
C23 C24 1.396(4) . ?
C23 H23 0.9500 . ?
C24 C26 1.497(4) . ?
C25 H25A 0.9800 . ?
C25 H25B 0.9800 . ?
C25 H25C 0.9800 . ?
C26 H26A 0.9800 . ?
C26 H26B 0.9800 . ?
C26 H26C 0.9800 . ?
C27 H27 0.9500 . ?
C28 C33 1.399(5) . ?
C28 C29 1.406(4) . ?
C29 C30 1.378(4) . ?
C29 C34 1.501(5) . ?
C30 C31 1.376(6) . ?
C30 H30 0.9500 . ?
C31 C32 1.379(6) . ?
C31 H31 0.9500 . ?
C32 C33 1.400(4) . ?
C32 H32 0.9500 . ?
C33 C35 1.513(5) . ?
C34 H34A 0.9800 . ?
C34 H34B 0.9800 . ?
C34 H34C 0.9800 . ?
C35 H35A 0.9800 . ?
C35 H35B 0.9800 . ?
C35 H35C 0.9800 . ?
C37 C42 1.390(4) . ?
C37 C38 1.398(4) . ?
C38 C39 1.392(4) . ?
C38 C43 1.505(5) . ?
C39 C40 1.373(5) . ?
C39 H39 0.9500 . ?
C40 C41 1.383(5) . ?
C40 H40 0.9500 . ?
C41 C42 1.392(4) . ?
C41 H41 0.9500 . ?
C42 C44 1.505(4) . ?
C43 H43A 0.9800 . ?
C43 H43B 0.9800 . ?
C43 H43C 0.9800 . ?
C44 H44A 0.9800 . ?
C44 H44B 0.9800 . ?
C44 H44C 0.9800 . ?
C45 H45 0.9500 . ?
C46 C47 1.403(4) . ?
C46 C51 1.413(4) . ?
C47 C48 1.392(4) . ?
C47 C52 1.512(4) . ?
C48 C49 1.396(4) . ?
C48 H48 0.9500 . ?
C49 C50 1.381(5) . ?
C49 H49 0.9500 . ?
C50 C51 1.391(4) . ?
C50 H50 0.9500 . ?
C51 C53 1.493(4) . ?
C52 H52A 0.9800 . ?
C52 H52B 0.9800 . ?
C52 H52C 0.9800 . ?
C53 H53A 0.9800 . ?
C53 H53B 0.9800 . ?
C53 H53C 0.9800 . ?
C55 C60 1.394(4) . ?
C55 C56 1.395(4) . ?
C56 C57 1.389(4) . ?
C56 C61 1.500(4) . ?
C57 C58 1.388(5) . ?
C57 H57 0.9500 . ?
C58 C59 1.379(5) . ?
C58 H58 0.9500 . ?
C59 C60 1.395(4) . ?
C59 H59 0.9500 . ?
C60 C62 1.503(5) . ?
C61 H61A 0.9800 . ?
C61 H61B 0.9800 . ?
C61 H61C 0.9800 . ?
C62 H62A 0.9800 . ?
C62 H62B 0.9800 . ?
C62 H62C 0.9800 . ?
C63 H63 0.9500 . ?
C64 C69 1.398(5) . ?
C64 C65 1.410(4) . ?
C65 C66 1.387(4) . ?
C65 C70 1.507(5) . ?
C66 C67 1.383(5) . ?
C66 H66 0.9500 . ?
C67 C68 1.381(5) . ?
C67 H67 0.9500 . ?
C68 C69 1.396(4) . ?
C68 H68 0.9500 . ?
C69 C71 1.514(4) . ?
C70 H70A 0.9800 . ?
C70 H70B 0.9800 . ?
C70 H70C 0.9800 . ?
C71 H71A 0.9800 . ?
C71 H71B 0.9800 . ?
C71 H71C 0.9800 . ?

loop_
_geom_angle_atom_site_label_1
_geom_angle_atom_site_label_2
_geom_angle_atom_site_label_3
_geom_angle
_geom_angle_site_symmetry_1
_geom_angle_site_symmetry_3
_geom_angle_publ_flag
S3 Au1 S1 176.10(3) . . ?
S3 Au1 Au2 94.234(18) . . ?
S1 Au1 Au2 88.355(18) . . ?
S3 Au1 Au4 102.69(2) . 1_455 ?
S1 Au1 Au4 79.451(19) . 1_455 ?
Au2 Au1 Au4 104.178(5) . 1_455 ?
S2 Au2 S4 175.37(3) . . ?
S2 Au2 Au1 96.215(18) . . ?
S4 Au2 Au1 87.62(2) . . ?
S2 Au2 Au3 91.57(2) . . ?
S4 Au2 Au3 89.83(2) . . ?
Au1 Au2 Au3 106.373(5) . . ?
S7 Au3 S5 172.62(3) . . ?
S7 Au3 Au4 92.061(19) . . ?
S5 Au3 Au4 93.944(19) . . ?
S7 Au3 Au2 105.61(2) . . ?
S5 Au3 Au2 77.44(2) . . ?
Au4 Au3 Au2 100.932(5) . . ?
S6 Au4 S8 172.62(3) . . ?
S6 Au4 Au3 93.435(19) . . ?
S8 Au4 Au3 93.634(19) . . ?
S6 Au4 Au1 90.45(2) . 1_655 ?
S8 Au4 Au1 88.33(2) . 1_655 ?
Au3 Au4 Au1 116.286(5) . 1_655 ?
C18 S1 Au1 110.75(10) . . ?
C18 S2 Au2 107.18(11) . . ?
C36 S3 Au1 106.94(10) . . ?
C36 S4 Au2 110.53(10) . . ?
C54 S5 Au3 109.89(10) . . ?
C54 S6 Au4 111.57(10) . . ?
C72 S7 Au3 111.93(10) . . ?
C72 S8 Au4 109.40(10) . . ?
C18 N1 C17 122.3(2) . . ?
C18 N1 C1 119.1(2) . . ?
C17 N1 C1 118.5(2) . . ?
C17 N2 C9 117.4(3) . . ?
C36 N3 C27 121.7(2) . . ?
C36 N3 C19 121.7(2) . . ?
C27 N3 C19 116.5(2) . . ?
C27 N4 C28 116.1(3) . . ?
C54 N5 C45 122.1(2) . . ?
C54 N5 C37 118.6(2) . . ?
C45 N5 C37 119.3(2) . . ?
C45 N6 C46 117.7(3) . . ?
C72 N7 C63 122.9(2) . . ?
C72 N7 C55 119.7(2) . . ?
C63 N7 C55 117.4(2) . . ?
C63 N8 C64 118.4(3) . . ?
C6 C1 C2 123.7(3) . . ?
C6 C1 N1 118.2(3) . . ?
C2 C1 N1 118.1(3) . . ?
C1 C2 C3 116.7(3) . . ?
C1 C2 C7 121.5(3) . . ?
C3 C2 C7 121.8(3) . . ?
C4 C3 C2 121.0(3) . . ?
C4 C3 H3 119.5 . . ?
C2 C3 H3 119.5 . . ?
C3 C4 C5 120.8(3) . . ?
C3 C4 H4 119.6 . . ?
C5 C4 H4 119.6 . . ?
C4 C5 C6 120.5(4) . . ?
C4 C5 H5 119.8 . . ?
C6 C5 H5 119.8 . . ?
C1 C6 C5 117.3(3) . . ?
C1 C6 C8 121.4(3) . . ?
C5 C6 C8 121.3(3) . . ?
C2 C7 H7A 109.5 . . ?
C2 C7 H7B 109.5 . . ?
H7A C7 H7B 109.5 . . ?
C2 C7 H7C 109.5 . . ?
H7A C7 H7C 109.5 . . ?
H7B C7 H7C 109.5 . . ?
C6 C8 H8A 109.5 . . ?
C6 C8 H8B 109.5 . . ?
H8A C8 H8B 109.5 . . ?
C6 C8 H8C 109.5 . . ?
H8A C8 H8C 109.5 . . ?
H8B C8 H8C 109.5 . . ?
C10 C9 C14 120.6(3) . . ?
C10 C9 N2 121.8(3) . . ?
C14 C9 N2 117.4(3) . . ?
C11 C10 C9 118.4(3) . . ?
C11 C10 C15 119.6(3) . . ?
C9 C10 C15 122.0(3) . . ?
C12 C11 C10 121.6(3) . . ?
C12 C11 H11 119.2 . . ?
C10 C11 H11 119.2 . . ?
C11 C12 C13 119.3(3) . . ?
C11 C12 H12 120.3 . . ?
C13 C12 H12 120.3 . . ?
C14 C13 C12 121.0(3) . . ?
C14 C13 H13 119.5 . . ?
C12 C13 H13 119.5 . . ?
C13 C14 C9 119.1(3) . . ?
C13 C14 C16 120.8(3) . . ?
C9 C14 C16 120.1(3) . . ?
C10 C15 H15A 109.5 . . ?
C10 C15 H15B 109.5 . . ?
H15A C15 H15B 109.5 . . ?
C10 C15 H15C 109.5 . . ?
H15A C15 H15C 109.5 . . ?
H15B C15 H15C 109.5 . . ?
C14 C16 H16A 109.5 . . ?
C14 C16 H16B 109.5 . . ?
H16A C16 H16B 109.5 . . ?
C14 C16 H16C 109.5 . . ?
H16A C16 H16C 109.5 . . ?
H16B C16 H16C 109.5 . . ?
N2 C17 N1 120.2(3) . . ?
N2 C17 H17 119.9 . . ?
N1 C17 H17 119.9 . . ?
N1 C18 S2 115.2(2) . . ?
N1 C18 S1 116.1(2) . . ?
S2 C18 S1 128.62(18) . . ?
C24 C19 C20 123.2(3) . . ?
C24 C19 N3 119.0(3) . . ?
C20 C19 N3 117.7(3) . . ?
C21 C20 C19 117.4(3) . . ?
C21 C20 C25 121.9(3) . . ?
C19 C20 C25 120.7(3) . . ?
C22 C21 C20 120.9(3) . . ?
C22 C21 H21 119.6 . . ?
C20 C21 H21 119.6 . . ?
C23 C22 C21 120.2(3) . . ?
C23 C22 H22 119.9 . . ?
C21 C22 H22 119.9 . . ?
C22 C23 C24 121.0(3) . . ?
C22 C23 H23 119.5 . . ?
C24 C23 H23 119.5 . . ?
C19 C24 C23 117.3(3) . . ?
C19 C24 C26 121.6(3) . . ?
C23 C24 C26 121.1(3) . . ?
C20 C25 H25A 109.5 . . ?
C20 C25 H25B 109.5 . . ?
H25A C25 H25B 109.5 . . ?
C20 C25 H25C 109.5 . . ?
H25A C25 H25C 109.5 . . ?
H25B C25 H25C 109.5 . . ?
C24 C26 H26A 109.5 . . ?
C24 C26 H26B 109.5 . . ?
H26A C26 H26B 109.5 . . ?
C24 C26 H26C 109.5 . . ?
H26A C26 H26C 109.5 . . ?
H26B C26 H26C 109.5 . . ?
N4 C27 N3 120.9(3) . . ?
N4 C27 H27 119.5 . . ?
N3 C27 H27 119.5 . . ?
C33 C28 C29 121.3(3) . . ?
C33 C28 N4 121.9(3) . . ?
C29 C28 N4 116.7(3) . . ?
C30 C29 C28 118.4(3) . . ?
C30 C29 C34 121.4(3) . . ?
C28 C29 C34 120.1(3) . . ?
C31 C30 C29 121.7(3) . . ?
C31 C30 H30 119.1 . . ?
C29 C30 H30 119.1 . . ?
C30 C31 C32 119.4(3) . . ?
C30 C31 H31 120.3 . . ?
C32 C31 H31 120.3 . . ?
C31 C32 C33 121.6(4) . . ?
C31 C32 H32 119.2 . . ?
C33 C32 H32 119.2 . . ?
C28 C33 C32 117.5(3) . . ?
C28 C33 C35 121.8(3) . . ?
C32 C33 C35 120.6(3) . . ?
C29 C34 H34A 109.5 . . ?
C29 C34 H34B 109.5 . . ?
H34A C34 H34B 109.5 . . ?
C29 C34 H34C 109.5 . . ?
H34A C34 H34C 109.5 . . ?
H34B C34 H34C 109.5 . . ?
C33 C35 H35A 109.5 . . ?
C33 C35 H35B 109.5 . . ?
H35A C35 H35B 109.5 . . ?
C33 C35 H35C 109.5 . . ?
H35A C35 H35C 109.5 . . ?
H35B C35 H35C 109.5 . . ?
N3 C36 S3 116.2(2) . . ?
N3 C36 S4 116.7(2) . . ?
S3 C36 S4 127.00(17) . . ?
C42 C37 C38 123.1(3) . . ?
C42 C37 N5 119.0(3) . . ?
C38 C37 N5 117.9(3) . . ?
C39 C38 C37 117.2(3) . . ?
C39 C38 C43 121.4(3) . . ?
C37 C38 C43 121.4(3) . . ?
C40 C39 C38 120.8(3) . . ?
C40 C39 H39 119.6 . . ?
C38 C39 H39 119.6 . . ?
C39 C40 C41 120.9(3) . . ?
C39 C40 H40 119.5 . . ?
C41 C40 H40 119.5 . . ?
C40 C41 C42 120.5(3) . . ?
C40 C41 H41 119.8 . . ?
C42 C41 H41 119.8 . . ?
C37 C42 C41 117.5(3) . . ?
C37 C42 C44 121.1(3) . . ?
C41 C42 C44 121.4(3) . . ?
C38 C43 H43A 109.5 . . ?
C38 C43 H43B 109.5 . . ?
H43A C43 H43B 109.5 . . ?
C38 C43 H43C 109.5 . . ?
H43A C43 H43C 109.5 . . ?
H43B C43 H43C 109.5 . . ?
C42 C44 H44A 109.5 . . ?
C42 C44 H44B 109.5 . . ?
H44A C44 H44B 109.5 . . ?
C42 C44 H44C 109.5 . . ?
H44A C44 H44C 109.5 . . ?
H44B C44 H44C 109.5 . . ?
N6 C45 N5 121.1(3) . . ?
N6 C45 H45 119.4 . . ?
N5 C45 H45 119.4 . . ?
C47 C46 C51 120.9(3) . . ?
C47 C46 N6 120.9(3) . . ?
C51 C46 N6 117.9(3) . . ?
C48 C47 C46 118.6(3) . . ?
C48 C47 C52 119.4(3) . . ?
C46 C47 C52 121.9(3) . . ?
C47 C48 C49 121.1(3) . . ?
C47 C48 H48 119.5 . . ?
C49 C48 H48 119.5 . . ?
C50 C49 C48 119.5(3) . . ?
C50 C49 H49 120.3 . . ?
C48 C49 H49 120.3 . . ?
C49 C50 C51 121.5(3) . . ?
C49 C50 H50 119.2 . . ?
C51 C50 H50 119.2 . . ?
C50 C51 C46 118.4(3) . . ?
C50 C51 C53 121.2(3) . . ?
C46 C51 C53 120.4(3) . . ?
C47 C52 H52A 109.5 . . ?
C47 C52 H52B 109.5 . . ?
H52A C52 H52B 109.5 . . ?
C47 C52 H52C 109.5 . . ?
H52A C52 H52C 109.5 . . ?
H52B C52 H52C 109.5 . . ?
C51 C53 H53A 109.5 . . ?
C51 C53 H53B 109.5 . . ?
H53A C53 H53B 109.5 . . ?
C51 C53 H53C 109.5 . . ?
H53A C53 H53C 109.5 . . ?
H53B C53 H53C 109.5 . . ?
N5 C54 S6 114.1(2) . . ?
N5 C54 S5 116.8(2) . . ?
S6 C54 S5 129.06(17) . . ?
C60 C55 C56 123.4(3) . . ?
C60 C55 N7 118.5(3) . . ?
C56 C55 N7 118.1(3) . . ?
C57 C56 C55 117.5(3) . . ?
C57 C56 C61 121.5(3) . . ?
C55 C56 C61 121.0(3) . . ?
C58 C57 C56 120.6(3) . . ?
C58 C57 H57 119.7 . . ?
C56 C57 H57 119.7 . . ?
C59 C58 C57 120.4(3) . . ?
C59 C58 H58 119.8 . . ?
C57 C58 H58 119.8 . . ?
C58 C59 C60 121.3(3) . . ?
C58 C59 H59 119.4 . . ?
C60 C59 H59 119.4 . . ?
C55 C60 C59 116.8(3) . . ?
C55 C60 C62 121.5(3) . . ?
C59 C60 C62 121.7(3) . . ?
C56 C61 H61A 109.5 . . ?
C56 C61 H61B 109.5 . . ?
H61A C61 H61B 109.5 . . ?
C56 C61 H61C 109.5 . . ?
H61A C61 H61C 109.5 . . ?
H61B C61 H61C 109.5 . . ?
C60 C62 H62A 109.5 . . ?
C60 C62 H62B 109.5 . . ?
H62A C62 H62B 109.5 . . ?
C60 C62 H62C 109.5 . . ?
H62A C62 H62C 109.5 . . ?
H62B C62 H62C 109.5 . . ?
N8 C63 N7 119.9(3) . . ?
N8 C63 H63 120.0 . . ?
N7 C63 H63 120.0 . . ?
C69 C64 C65 120.8(3) . . ?
C69 C64 N8 121.6(3) . . ?
C65 C64 N8 117.5(3) . . ?
C66 C65 C64 118.6(3) . . ?
C66 C65 C70 121.5(3) . . ?
C64 C65 C70 119.9(3) . . ?
C67 C66 C65 121.3(3) . . ?
C67 C66 H66 119.4 . . ?
C65 C66 H66 119.4 . . ?
C68 C67 C66 119.6(3) . . ?
C68 C67 H67 120.2 . . ?
C66 C67 H67 120.2 . . ?
C67 C68 C69 121.3(3) . . ?
C67 C68 H68 119.3 . . ?
C69 C68 H68 119.3 . . ?
C68 C69 C64 118.5(3) . . ?
C68 C69 C71 119.3(3) . . ?
C64 C69 C71 122.2(3) . . ?
C65 C70 H70A 109.5 . . ?
C65 C70 H70B 109.5 . . ?
H70A C70 H70B 109.5 . . ?
C65 C70 H70C 109.5 . . ?
H70A C70 H70C 109.5 . . ?
H70B C70 H70C 109.5 . . ?
C69 C71 H71A 109.5 . . ?
C69 C71 H71B 109.5 . . ?
H71A C71 H71B 109.5 . . ?
C69 C71 H71C 109.5 . . ?
H71A C71 H71C 109.5 . . ?
H71B C71 H71C 109.5 . . ?
N7 C72 S7 114.4(2) . . ?
N7 C72 S8 117.4(2) . . ?
S7 C72 S8 128.11(17) . . ?

loop_
_geom_torsion_atom_site_label_1
_geom_torsion_atom_site_label_2
_geom_torsion_atom_site_label_3
_geom_torsion_atom_site_label_4
_geom_torsion
_geom_torsion_site_symmetry_1
_geom_torsion_site_symmetry_2
_geom_torsion_site_symmetry_3
_geom_torsion_site_symmetry_4
_geom_torsion_publ_flag
C18 N1 C1 C6 -93.8(3) . . . . ?
C17 N1 C1 C6 82.5(3) . . . . ?
C18 N1 C1 C2 83.9(3) . . . . ?
C17 N1 C1 C2 -99.8(3) . . . . ?
C6 C1 C2 C3 1.2(5) . . . . ?
N1 C1 C2 C3 -176.4(3) . . . . ?
C6 C1 C2 C7 -179.4(3) . . . . ?
N1 C1 C2 C7 3.1(4) . . . . ?
C1 C2 C3 C4 0.6(5) . . . . ?
C7 C2 C3 C4 -178.9(3) . . . . ?
C2 C3 C4 C5 -1.4(5) . . . . ?
C3 C4 C5 C6 0.5(5) . . . . ?
C2 C1 C6 C5 -2.1(4) . . . . ?
N1 C1 C6 C5 175.5(3) . . . . ?
C2 C1 C6 C8 178.5(3) . . . . ?
N1 C1 C6 C8 -4.0(4) . . . . ?
C4 C5 C6 C1 1.2(5) . . . . ?
C4 C5 C6 C8 -179.4(3) . . . . ?
C17 N2 C9 C10 -62.1(4) . . . . ?
C17 N2 C9 C14 122.9(3) . . . . ?
C14 C9 C10 C11 -0.6(4) . . . . ?
N2 C9 C10 C11 -175.4(3) . . . . ?
C14 C9 C10 C15 178.3(3) . . . . ?
N2 C9 C10 C15 3.5(5) . . . . ?
C9 C10 C11 C12 1.1(5) . . . . ?
C15 C10 C11 C12 -177.8(3) . . . . ?
C10 C11 C12 C13 -0.8(5) . . . . ?
C11 C12 C13 C14 -0.2(5) . . . . ?
C12 C13 C14 C9 0.7(4) . . . . ?
C12 C13 C14 C16 -176.9(3) . . . . ?
C10 C9 C14 C13 -0.4(4) . . . . ?
N2 C9 C14 C13 174.7(3) . . . . ?
C10 C9 C14 C16 177.3(3) . . . . ?
N2 C9 C14 C16 -7.7(4) . . . . ?
C9 N2 C17 N1 179.6(3) . . . . ?
C18 N1 C17 N2 -171.6(3) . . . . ?
C1 N1 C17 N2 12.2(4) . . . . ?
C17 N1 C18 S2 -162.2(2) . . . . ?
C1 N1 C18 S2 13.9(3) . . . . ?
C17 N1 C18 S1 20.4(4) . . . . ?
C1 N1 C18 S1 -163.4(2) . . . . ?
Au2 S2 C18 N1 -177.65(19) . . . . ?
Au2 S2 C18 S1 -0.7(2) . . . . ?
Au1 S1 C18 N1 -159.60(19) . . . . ?
Au1 S1 C18 S2 23.5(2) . . . . ?
C36 N3 C19 C24 -96.9(3) . . . . ?
C27 N3 C19 C24 85.0(3) . . . . ?
C36 N3 C19 C20 87.3(3) . . . . ?
C27 N3 C19 C20 -90.8(3) . . . . ?
C24 C19 C20 C21 1.6(4) . . . . ?
N3 C19 C20 C21 177.2(3) . . . . ?
C24 C19 C20 C25 -176.6(3) . . . . ?
N3 C19 C20 C25 -1.1(4) . . . . ?
C19 C20 C21 C22 -1.3(5) . . . . ?
C25 C20 C21 C22 176.9(3) . . . . ?
C20 C21 C22 C23 0.1(5) . . . . ?
C21 C22 C23 C24 0.9(5) . . . . ?
C20 C19 C24 C23 -0.6(4) . . . . ?
N3 C19 C24 C23 -176.2(3) . . . . ?
C20 C19 C24 C26 178.9(3) . . . . ?
N3 C19 C24 C26 3.3(4) . . . . ?
C22 C23 C24 C19 -0.7(4) . . . . ?
C22 C23 C24 C26 179.8(3) . . . . ?
C28 N4 C27 N3 -179.7(3) . . . . ?
C36 N3 C27 N4 -175.5(3) . . . . ?
C19 N3 C27 N4 2.5(4) . . . . ?
C27 N4 C28 C33 64.8(4) . . . . ?
C27 N4 C28 C29 -117.3(3) . . . . ?
C33 C28 C29 C30 -0.5(4) . . . . ?
N4 C28 C29 C30 -178.5(3) . . . . ?
C33 C28 C29 C34 -178.3(3) . . . . ?
N4 C28 C29 C34 3.8(4) . . . . ?
C28 C29 C30 C31 -0.4(5) . . . . ?
C34 C29 C30 C31 177.3(3) . . . . ?
C29 C30 C31 C32 1.4(5) . . . . ?
C30 C31 C32 C33 -1.4(5) . . . . ?
C29 C28 C33 C32 0.5(4) . . . . ?
N4 C28 C33 C32 178.3(3) . . . . ?
C29 C28 C33 C35 -177.2(3) . . . . ?
N4 C28 C33 C35 0.6(4) . . . . ?
C31 C32 C33 C28 0.5(5) . . . . ?
C31 C32 C33 C35 178.2(3) . . . . ?
C27 N3 C36 S3 -172.7(2) . . . . ?
C19 N3 C36 S3 9.3(4) . . . . ?
C27 N3 C36 S4 10.1(4) . . . . ?
C19 N3 C36 S4 -167.9(2) . . . . ?
Au1 S3 C36 N3 -176.8(2) . . . . ?
Au1 S3 C36 S4 0.1(2) . . . . ?
Au2 S4 C36 N3 -154.8(2) . . . . ?
Au2 S4 C36 S3 28.3(2) . . . . ?
C54 N5 C37 C42 97.7(3) . . . . ?
C45 N5 C37 C42 -82.9(3) . . . . ?
C54 N5 C37 C38 -79.4(3) . . . . ?
C45 N5 C37 C38 99.9(3) . . . . ?
C42 C37 C38 C39 -0.4(4) . . . . ?
N5 C37 C38 C39 176.6(2) . . . . ?
C42 C37 C38 C43 -179.2(3) . . . . ?
N5 C37 C38 C43 -2.2(4) . . . . ?
C37 C38 C39 C40 -0.2(4) . . . . ?
C43 C38 C39 C40 178.6(3) . . . . ?
C38 C39 C40 C41 0.2(5) . . . . ?
C39 C40 C41 C42 0.4(5) . . . . ?
C38 C37 C42 C41 1.0(4) . . . . ?
N5 C37 C42 C41 -176.0(2) . . . . ?
C38 C37 C42 C44 -179.8(3) . . . . ?
N5 C37 C42 C44 3.2(4) . . . . ?
C40 C41 C42 C37 -0.9(4) . . . . ?
C40 C41 C42 C44 179.9(3) . . . . ?
C46 N6 C45 N5 -176.5(3) . . . . ?
C54 N5 C45 N6 174.7(3) . . . . ?
C37 N5 C45 N6 -4.6(4) . . . . ?
C45 N6 C46 C47 62.3(4) . . . . ?
C45 N6 C46 C51 -123.8(3) . . . . ?
C51 C46 C47 C48 1.2(4) . . . . ?
N6 C46 C47 C48 175.0(3) . . . . ?
C51 C46 C47 C52 -176.2(3) . . . . ?
N6 C46 C47 C52 -2.5(4) . . . . ?
C46 C47 C48 C49 -0.7(4) . . . . ?
C52 C47 C48 C49 176.8(3) . . . . ?
C47 C48 C49 C50 0.3(5) . . . . ?
C48 C49 C50 C51 -0.5(5) . . . . ?
C49 C50 C51 C46 1.1(5) . . . . ?
C49 C50 C51 C53 179.7(3) . . . . ?
C47 C46 C51 C50 -1.4(4) . . . . ?
N6 C46 C51 C50 -175.3(3) . . . . ?
C47 C46 C51 C53 180.0(3) . . . . ?
N6 C46 C51 C53 6.1(4) . . . . ?
C45 N5 C54 S6 165.1(2) . . . . ?
C37 N5 C54 S6 -15.6(3) . . . . ?
C45 N5 C54 S5 -17.4(4) . . . . ?
C37 N5 C54 S5 162.0(2) . . . . ?
Au4 S6 C54 N5 176.17(17) . . . . ?
Au4 S6 C54 S5 -1.0(2) . . . . ?
Au3 S5 C54 N5 172.64(18) . . . . ?
Au3 S5 C54 S6 -10.2(2) . . . . ?
C72 N7 C55 C60 89.0(3) . . . . ?
C63 N7 C55 C60 -91.7(3) . . . . ?
C72 N7 C55 C56 -91.4(3) . . . . ?
C63 N7 C55 C56 87.8(3) . . . . ?
C60 C55 C56 C57 -1.9(4) . . . . ?
N7 C55 C56 C57 178.5(2) . . . . ?
C60 C55 C56 C61 178.3(3) . . . . ?
N7 C55 C56 C61 -1.3(4) . . . . ?
C55 C56 C57 C58 1.9(4) . . . . ?
C61 C56 C57 C58 -178.3(3) . . . . ?
C56 C57 C58 C59 -0.9(5) . . . . ?
C57 C58 C59 C60 -0.3(5) . . . . ?
C56 C55 C60 C59 0.8(4) . . . . ?
N7 C55 C60 C59 -179.7(2) . . . . ?
C56 C55 C60 C62 -179.2(3) . . . . ?
N7 C55 C60 C62 0.4(4) . . . . ?
C58 C59 C60 C55 0.3(4) . . . . ?
C58 C59 C60 C62 -179.7(3) . . . . ?
C64 N8 C63 N7 177.3(3) . . . . ?
C72 N7 C63 N8 177.0(3) . . . . ?
C55 N7 C63 N8 -2.3(4) . . . . ?
C63 N8 C64 C69 -65.4(4) . . . . ?
C63 N8 C64 C65 119.2(3) . . . . ?
C69 C64 C65 C66 0.4(4) . . . . ?
N8 C64 C65 C66 175.8(3) . . . . ?
C69 C64 C65 C70 179.3(3) . . . . ?
N8 C64 C65 C70 -5.3(4) . . . . ?
C64 C65 C66 C67 0.1(5) . . . . ?
C70 C65 C66 C67 -178.8(3) . . . . ?
C65 C66 C67 C68 -0.3(5) . . . . ?
C66 C67 C68 C69 0.0(5) . . . . ?
C67 C68 C69 C64 0.5(5) . . . . ?
C67 C68 C69 C71 -178.1(3) . . . . ?
C65 C64 C69 C68 -0.6(4) . . . . ?
N8 C64 C69 C68 -175.9(3) . . . . ?
C65 C64 C69 C71 177.8(3) . . . . ?
N8 C64 C69 C71 2.6(4) . . . . ?
C63 N7 C72 S7 177.8(2) . . . . ?
C55 N7 C72 S7 -3.0(3) . . . . ?
C63 N7 C72 S8 -2.9(4) . . . . ?
C55 N7 C72 S8 176.3(2) . . . . ?
Au3 S7 C72 N7 175.29(18) . . . . ?
Au3 S7 C72 S8 -4.0(2) . . . . ?
Au4 S8 C72 N7 167.30(19) . . . . ?
Au4 S8 C72 S7 -13.4(2) . . . . ?

_refine_diff_density_max         0.908
_refine_diff_density_min         -0.770
_refine_diff_density_rms         0.091

_shelxl_version_number           2013-4


_diffrn_standards_decay_%        0.0
_symmetry_cell_setting           triclinic
_symmetry_space_group_name_h-m   'P -1'
_symmetry_int_tables_number      2
